# Supplementary material for: Characterization of Filamentous Flocs to Predict Sedimentation Parameters Using Image Analysis
Source: Hindawi journal article supplement (doi:10.1155/2020/5248509), 2020-02-11

**DATA**

## A.1 Tablas de datos altura v/s tiempo distintos sondeos

Tabla A-1: Datos de concentración y altura experiencia de sedimentación 5,4 (m/h).

| Concentración<br>5,25kgr/m <sup>3</sup> |               | Concentración<br>4,26kgr/m <sup>3</sup> |               | Concentración<br>2,17kgr/m <sup>3</sup> |               | Concentración<br>1,68 kgr/m <sup>3</sup> |               |
|-----------------------------------------|---------------|-----------------------------------------|---------------|-----------------------------------------|---------------|------------------------------------------|---------------|
| Tiempo<br>(h)                           | Altura<br>(m) | Tiempo<br>(h)                           | Altura<br>(m) | Tiempo<br>(h)                           | Altura<br>(m) | Tiempo<br>(h)                            | Altura<br>(m) |
| 0,000                                   | 0,622         | 0,000                                   | 0,622         | 0,000                                   | 0,622         | 0,000                                    | 0,622         |
| 0,017                                   | 0,617         | 0,017                                   | 0,614         | 0,017                                   | 0,600         | 0,017                                    | 0,595         |
| 0,033                                   | 0,613         | 0,033                                   | 0,609         | 0,033                                   | 0,576         | 0,033                                    | 0,563         |
| 0,050                                   | 0,610         | 0,050                                   | 0,603         | 0,050                                   | 0,550         | 0,050                                    | 0,523         |
| 0,067                                   | 0,606         | 0,067                                   | 0,595         | 0,067                                   | 0,517         | 0,067                                    | 0,491         |
| 0,083                                   | 0,603         | 0,083                                   | 0,584         | 0,083                                   | 0,487         | 0,083                                    | 0,452         |
| 0,100                                   | 0,600         | 0,100                                   | 0,572         | 0,100                                   | 0,462         | 0,100                                    | 0,412         |
| 0,117                                   | 0,597         | 0,117                                   | 0,557         | 0,117                                   | 0,437         | 0,117                                    | 0,372         |
| 0,133                                   | 0,593         | 0,133                                   | 0,542         | 0,133                                   | 0,412         | 0,133                                    | 0,337         |
| 0,150                                   | 0,589         | 0,150                                   | 0,526         | 0,150                                   | 0,388         | 0,150                                    | 0,302         |
| 0,167                                   | 0,586         | 0,167                                   | 0,509         | 0,167                                   | 0,368         | 0,167                                    | 0,282         |
| 0,183                                   | 0,582         | 0,183                                   | 0,490         | 0,183                                   | 0,348         | 0,183                                    | 0,263         |
| 0,200                                   | 0,579         | 0,200                                   | 0,469         | 0,200                                   | 0,333         | 0,200                                    | 0,244         |
| 0,217                                   | 0,575         | 0,217                                   | 0,449         | 0,217                                   | 0,323         | 0,217                                    | 0,234         |
| 0,233                                   | 0,572         | 0,233                                   | 0,433         | 0,233                                   | 0,313         | 0,233                                    | 0,227         |
| 0,250                                   | 0,569         | 0,250                                   | 0,418         | 0,250                                   | 0,305         | 0,250                                    | 0,22          |
| 0,267                                   | 0,565         | 0,267                                   | 0,403         | 0,267                                   | 0,298         | 0,267                                    | 0,215         |
| 0,283                                   | 0,562         | 0,283                                   | 0,391         | 0,283                                   | 0,292         | 0,283                                    | 0,211         |
| 0,300                                   | 0,558         | 0,300                                   | 0,380         | 0,300                                   | 0,287         | 0,300                                    | 0,207         |
| 0,317                                   | 0,554         | 0,317                                   | 0,370         | 0,317                                   | 0,282         | 0,317                                    | 0,203         |
| 0,333                                   | 0,550         | 0,333                                   | 0,363         | 0,333                                   | 0,277         | 0,333                                    | 0,199         |
| 0,350                                   | 0,545         | 0,350                                   | 0,356         | 0,350                                   | 0,273         | 0,350                                    | 0,196         |
| 0,367                                   | 0,541         | 0,367                                   | 0,350         | 0,367                                   | 0,269         | 0,367                                    | 0,193         |
| 0,383                                   | 0,536         | 0,383                                   | 0,345         | 0,383                                   | 0,266         | 0,383                                    | 0,19          |
| 0,400                                   | 0,532         | 0,400                                   | 0,340         | 0,400                                   | 0,263         | 0,400                                    | 0,188         |
| 0,417                                   | 0,527         | 0,417                                   | 0,335         | 0,417                                   | 0,261         | 0,417                                    | 0,186         |
| 0,433                                   | 0,522         | 0,433                                   | 0,331         | 0,433                                   | 0,259         | 0,433                                    | 0,184         |
| 0,450                                   | 0,518         | 0,450                                   | 0,328         | 0,450                                   | 0,257         | 0,450                                    | 0,182         |
| 0,467                                   | 0,514         | 0,467                                   | 0,325         | 0,467                                   | 0,255         | 0,467                                    | 0,18          |
| 0,483                                   | 0,511         | 0,483                                   | 0,322         | 0,483                                   | 0,253         | 0,483                                    | 0,178         |
| 0,500                                   | 0,507         | 0,500                                   | 0,319         | 0,500                                   | 0,251         | 0,500                                    | 0,176         |
| 0,517                                   | 0,503         | 0,517                                   | 0,316         | 0,517                                   | 0,249         | 0,517                                    | 0,174         |
| 0,533                                   | 0,499         | 0,533                                   | 0,313         | 0,533                                   | 0,247         | 0,533                                    | 0,172         |
| 0,550                                   | 0,496         | 0,550                                   | 0,311         | 0,550                                   | 0,246         | 0,550                                    | 0,17          |
| 0,567                                   | 0,493         | 0,567                                   | 0,309         | 0,567                                   | 0,245         | 0,567                                    | 0,168         |
| 0,583                                   | 0,490         | 0,583                                   | 0,307         | 0,583                                   | 0,244         | 0,583                                    | 0,167         |

Tabla A-2: Datos de concentración y altura experiencia de sedimentación 8,7 (m/h).

| Concentración<br>4,35kgr/m <sup>3</sup> |               | Concentración<br>3,05kgr/m <sup>3</sup> |               | Concentración<br>2,10kgr/m <sup>3</sup> |               |
|-----------------------------------------|---------------|-----------------------------------------|---------------|-----------------------------------------|---------------|
| Tiempo<br>(h)                           | Altura<br>(m) | Tiempo<br>(h)                           | Altura<br>(m) | Tiempo<br>(h)                           | Altura<br>(m) |
| 0,000                                   | 0,624         | 0,000                                   | 0,624         | 0,000                                   | 0,624         |
| 0,017                                   | 0,614         | 0,017                                   | 0,606         | 0,017                                   | 0,597         |
| 0,033                                   | 0,609         | 0,033                                   | 0,596         | 0,033                                   | 0,572         |
| 0,050                                   | 0,603         | 0,050                                   | 0,58          | 0,050                                   | 0,542         |
| 0,067                                   | 0,595         | 0,067                                   | 0,561         | 0,067                                   | 0,512         |
| 0,083                                   | 0,587         | 0,083                                   | 0,539         | 0,083                                   | 0,472         |
| 0,100                                   | 0,579         | 0,100                                   | 0,518         | 0,100                                   | 0,436         |
| 0,117                                   | 0,569         | 0,117                                   | 0,495         | 0,117                                   | 0,400         |
| 0,133                                   | 0,559         | 0,133                                   | 0,470         | 0,133                                   | 0,365         |
| 0,150                                   | 0,551         | 0,150                                   | 0,445         | 0,150                                   | 0,345         |
| 0,167                                   | 0,541         | 0,167                                   | 0,425         | 0,167                                   | 0,331         |
| 0,183                                   | 0,533         | 0,183                                   | 0,406         | 0,183                                   | 0,316         |
| 0,200                                   | 0,526         | 0,200                                   | 0,388         | 0,200                                   | 0,305         |
| 0,217                                   | 0,519         | 0,217                                   | 0,374         | 0,217                                   | 0,295         |
| 0,233                                   | 0,512         | 0,233                                   | 0,360         | 0,233                                   | 0,285         |
| 0,250                                   | 0,505         | 0,250                                   | 0,351         | 0,250                                   | 0,279         |
| 0,267                                   | 0,497         | 0,267                                   | 0,342         | 0,267                                   | 0,273         |
| 0,283                                   | 0,49          | 0,283                                   | 0,334         | 0,283                                   | 0,267         |
| 0,300                                   | 0,483         | 0,300                                   | 0,327         | 0,300                                   | 0,262         |
| 0,317                                   | 0,476         | 0,317                                   | 0,321         | 0,317                                   | 0,257         |
| 0,333                                   | 0,468         | 0,333                                   | 0,316         | 0,333                                   | 0,252         |
| 0,350                                   | 0,461         | 0,350                                   | 0,311         | 0,350                                   | 0,248         |
| 0,367                                   | 0,454         | 0,367                                   | 0,306         | 0,367                                   | 0,244         |
| 0,383                                   | 0,446         | 0,383                                   | 0,301         | 0,383                                   | 0,241         |
| 0,400                                   | 0,436         | 0,400                                   | 0,297         | 0,400                                   | 0,238         |
| 0,417                                   | 0,428         | 0,417                                   | 0,293         | 0,417                                   | 0,235         |
| 0,433                                   | 0,419         | 0,433                                   | 0,290         | 0,433                                   | 0,233         |
| 0,450                                   | 0,409         | 0,450                                   | 0,287         | 0,450                                   | 0,23          |
| 0,467                                   | 0,401         | 0,467                                   | 0,284         | 0,467                                   | 0,228         |
| 0,483                                   | 0,394         | 0,483                                   | 0,281         | 0,483                                   | 0,226         |
| 0,500                                   | 0,387         | 0,500                                   | 0,278         | 0,500                                   | 0,224         |
| 0,517                                   | 0,381         | 0,517                                   | 0,275         | 0,517                                   | 0,222         |
| 0,533                                   | 0,376         | 0,533                                   | 0,273         | 0,533                                   | 0,220         |
| 0,550                                   | 0,372         | 0,550                                   | 0,271         | 0,550                                   | 0,219         |
| 0,567                                   | 0,368         | 0,567                                   | 0,269         | 0,567                                   | 0,218         |
| 0,583                                   | 0,364         | 0,583                                   | 0,268         | 0,583                                   | 0,217         |

Tabla A-3: Datos de concentración y altura experiencia de sedimentación 41,8(m/h).

| Concentración<br>3,13kgr/m <sup>3</sup> |               | Concentración<br>2,52kgr/m <sup>3</sup> |               |
|-----------------------------------------|---------------|-----------------------------------------|---------------|
| Tiempo<br>(h)                           | Altura<br>(m) | Tiempo<br>(h)                           | Altura<br>(m) |
| 0,000                                   | 0,622         | 0,000                                   | 0,622         |
| 0,017                                   | 0,608         | 0,017                                   | 0,578         |
| 0,033                                   | 0,597         | 0,033                                   | 0,552         |
| 0,050                                   | 0,580         | 0,050                                   | 0,512         |
| 0,067                                   | 0,560         | 0,067                                   | 0,472         |
| 0,083                                   | 0,539         | 0,083                                   | 0,427         |
| 0,100                                   | 0,516         | 0,100                                   | 0,382         |
| 0,117                                   | 0,494         | 0,117                                   | 0,327         |
| 0,133                                   | 0,471         | 0,133                                   | 0,287         |
| 0,150                                   | 0,447         | 0,150                                   | 0,264         |
| 0,167                                   | 0,423         | 0,167                                   | 0,246         |
| 0,183                                   | 0,401         | 0,183                                   | 0,235         |
| 0,200                                   | 0,386         | 0,200                                   | 0,226         |
| 0,217                                   | 0,372         | 0,217                                   | 0,218         |
| 0,233                                   | 0,360         | 0,233                                   | 0,211         |
| 0,250                                   | 0,349         | 0,250                                   | 0,207         |
| 0,267                                   | 0,340         | 0,267                                   | 0,203         |
| 0,283                                   | 0,333         | 0,283                                   | 0,199         |
| 0,300                                   | 0,327         | 0,300                                   | 0,196         |
| 0,317                                   | 0,323         | 0,317                                   | 0,192         |
| 0,333                                   | 0,320         | 0,333                                   | 0,189         |
| 0,350                                   | 0,316         | 0,350                                   | 0,187         |
| 0,367                                   | 0,313         | 0,367                                   | 0,184         |
| 0,383                                   | 0,309         | 0,383                                   | 0,182         |
| 0,400                                   | 0,305         | 0,400                                   | 0,180         |
| 0,417                                   | 0,302         | 0,417                                   | 0,178         |
| 0,433                                   | 0,299         | 0,433                                   | 0,176         |
| 0,450                                   | 0,296         | 0,450                                   | 0,174         |
| 0,467                                   | 0,293         | 0,467                                   | 0,172         |
| 0,483                                   | 0,291         | 0,483                                   | 0,170         |
| 0,500                                   | 0,289         | 0,500                                   | 0,168         |
| 0,517                                   | 0,287         | 0,517                                   | 0,167         |
| 0,533                                   | 0,285         | 0,533                                   | 0,166         |
| 0,550                                   | 0,283         | 0,550                                   | 0,165         |
| 0,567                                   | 0,281         | 0,567                                   | 0,164         |
| 0,583                                   | 0,279         | 0,583                                   | 0,163         |

Tabla A-4: Valores medios de propiedades sedimentación 5,4 (m/h) (magnificación 50X).

| Nombre Foto | Nº de objetos | Área píxeles <sup>2</sup> | Área mm <sup>2</sup> | Perímetros píxeles | Perímetros mm |
|-------------|---------------|---------------------------|----------------------|--------------------|---------------|
| 03-12-x5-1  | 30            | 8819                      | 1,32E-02             | 779,8              | 0,95          |
| 03-12-x5-2  | 37            | 7485                      | 1,12E-02             | 710,7              | 0,87          |
| 03-12-x5-3  | 15            | 7032                      | 1,05E-02             | 767,5              | 0,94          |
| 03-12-x5-4  | 16            | 6965                      | 1,04E-02             | 787,2              | 0,96          |
| 03-12-x5-5  | 13            | 9385                      | 1,41E-02             | 1000,2             | 1,22          |
| 03-12-x5-6  | 8             | 28536                     | 4,27E-02             | 1808,7             | 2,21          |
| 03-12-x5-7  | 9             | 14936                     | 2,24E-02             | 983,5              | 1,20          |
| 03-12-x5-8  | 13            | 9874                      | 1,48E-02             | 712,1              | 0,87          |

Tabla A-5: Valores medios de propiedades sedimentación 5,4 (m/h) (magnificación 100X).

| Nombre Foto | Nº de objetos | Área píxeles <sup>2</sup> | Área mm <sup>2</sup> | Perímetros píxeles | Perímetros mm |
|-------------|---------------|---------------------------|----------------------|--------------------|---------------|
| 03-12-x10-1 | 19            | 14468                     | 1,08E-02             | 875,6              | 0,758         |
| 03-12-x10-2 | 21            | 11074                     | 8,29E-03             | 926,1              | 0,801         |
| 03-12-x10-3 | 41            | 6720                      | 5,03E-03             | 682,7              | 0,591         |
| 03-12-x10-4 | 36            | 4313                      | 3,23E-03             | 586,6              | 0,508         |
| 03-12-x10-5 | 13            | 14738                     | 1,10E-02             | 1087,0             | 0,941         |
| 03-12-x10-6 | 28            | 11242                     | 8,42E-03             | 806,3              | 0,698         |
| 03-12-x10-7 | 6             | 36630                     | 2,74E-02             | 1624,0             | 1,405         |

Tabla A-6: Valores medios de propiedades sedimentación 8,7 (m/h) (magnificación 50X).

| Nombre Foto | Nº de objetos | Área píxeles <sup>2</sup> | Área mm <sup>2</sup> | Perímetros píxeles | Perímetros mm |
|-------------|---------------|---------------------------|----------------------|--------------------|---------------|
| 10-12-x5-1  | 39            | 3860                      | 2,21E-02             | 525,7              | 1,193         |
| 10-12-x5-2  | 64            | 3100                      | 1,77E-02             | 395,7              | 0,898         |
| 10-12-x5-3  | 47            | 1854                      | 1,06E-02             | 322,9              | 0,733         |
| 10-12-x5-4  | 31            | 2020                      | 1,16E-02             | 305,5              | 0,693         |
| 10-12-x5-5  | 47            | 1702                      | 9,73E-03             | 356,6              | 0,809         |
| 10-12-x5-6  | 35            | 3324                      | 1,90E-02             | 486,3              | 1,104         |
| 10-12-x5-7  | 36            | 4493                      | 2,57E-02             | 547,6              | 1,243         |
| 10-12-x5-8  | 32            | 5991                      | 3,43E-02             | 576,5              | 1,308         |

Tabla A-7: Valores medios de propiedades sedimentación 8,7 (m/h) (magnificación 100X).

| Nombre Foto | Nº de objetos | Área píxeles <sup>2</sup> | Área mm <sup>2</sup> | Perímetros píxeles | Perímetros mm |
|-------------|---------------|---------------------------|----------------------|--------------------|---------------|
| 10-12-x10-1 | 16            | 4819                      | 1,378E-02            | 587,6              | 0,667         |
| 10-12-x10-2 | 17            | 6812                      | 1,947E-02            | 576,0              | 0,654         |
| 10-12-x10-3 | 49            | 3010                      | 8,605E-03            | 438,2              | 0,497         |
| 10-12-x10-4 | 32            | 3106                      | 8,880E-03            | 452,0              | 0,513         |
| 10-12-x10-5 | 18            | 11788                     | 3,370E-02            | 857,6              | 0,973         |

Tabla A-8: Valores medios de propiedades sedimentación 41,8 (m/h) (magnificación 50X).

| Nombre Foto | Nº de objetos | Área píxeles <sup>2</sup> | Área mm <sup>2</sup> | Perímetros píxeles | Perímetros mm |
|-------------|---------------|---------------------------|----------------------|--------------------|---------------|
| 17-12-x5-1  | 24            | 1451                      | 4,43E-03             | 295,2              | 0,52          |
| 17-12-x5-2  | 11            | 1559                      | 4,76E-03             | 240,8              | 0,42          |
| 17-12-x5-3  | 22            | 2277                      | 6,95E-03             | 345,3              | 0,60          |
| 17-12-x5-4  | 10            | 24168                     | 7,38E-02             | 1154,3             | 2,02          |
| 17-12-x5-5  | 22            | 6083                      | 1,86E-02             | 651,8              | 1,14          |
| 17-12-x5-6  | 20            | 12292                     | 3,75E-02             | 822,1              | 1,44          |
| 17-12-x5-7  | 35            | 1075                      | 3,28E-03             | 263,4              | 0,46          |
| 17-12-x5-8  | 20            | 3350                      | 1,02E-02             | 454,4              | 0,79          |

Tabla A-9: Valores medios de propiedades sedimentación 41,78 (m/h) (magnificación 100X).

| Nombre Foto | Nº de objetos | Área píxeles <sup>2</sup> | Área mm <sup>2</sup> | Perímetros píxeles | Perímetros mm |
|-------------|---------------|---------------------------|----------------------|--------------------|---------------|
| 17-12-x10-1 | 13            | 7483                      | 1,14E-02             | 852,0              | 1,053         |
| 17-12-x10-2 | 3             | 16797                     | 2,56E-02             | 986,2              | 1,218         |
| 17-12-x10-3 | 16            | 8093                      | 1,24E-02             | 804,0              | 0,993         |
| 17-12-x10-4 | 12            | 24094                     | 3,68E-02             | 1437,0             | 1,775         |
| 17-12-x10-5 | 18            | 14643                     | 2,23E-02             | 1039,9             | 1,285         |
| 17-12-x10-6 | 27            | 3529                      | 5,39E-03             | 485,8              | 0,600         |
| 17-12-x10-7 | 7             | 16983                     | 2,59E-02             | 1289,6             | 1,593         |
| 17-12-x10-8 | 6             | 11499                     | 1,76E-02             | 840,7              | 1,039         |

## A.6 Gráficos de conectividad de flóculos

Tabla A-10: Conectividad de flóculos sedimentación 5,4 (m/h) (magnificación 50X).

| Nombre Foto | N° de Cluster | N° de flóculos por Cluster | N° de flóculos | % de flóculos conectados | % de cluster |
|-------------|---------------|----------------------------|----------------|--------------------------|--------------|
| 03-12-x5-1  | 1             | 30                         | 30             | 100                      | 3,3          |
| 03-12-x5-2  | 1             | 36<br>1                    | 37             | 97,3                     | 2,7          |
| 03-12-x5-3  | 1             | 14<br>1                    | 15             | 93,3                     | 6,7          |
| 03-12-x5-4  | 1             | 15<br>1                    | 16             | 93,8                     | 6,3          |
| 03-12-x5-5  | 2             | 8<br>1<br>1<br>1<br>2      | 13             | 76,9                     | 15,4         |
| 03-12-x5-6  | 2             | 5<br>3                     | 8              | 100                      | 25,0         |
| 03-12-x5-7  | 2             | 3<br>4<br>1<br>1           | 9              | 77,8                     | 22,2         |
| 03-12-x5-8  | 1             | 13                         | 13             | 100                      | 7,7          |

Tabla A-11: Conectividad de flóculos sedimentación 5,4 (m/h) (magnificación 100X).

| Nombre Foto | N° de Cluster | N° de flóculos por Cluster | N° de flóculos | % de flóculos conectados | % de cluster |
|-------------|---------------|----------------------------|----------------|--------------------------|--------------|
| 03-12-x10-1 | 1             | 19                         | 19             | 100                      | 5,3          |
| 03-12-x10-2 | 1             | 21                         | 21             | 100                      | 4,8          |
| 03-12-x10-3 | 1             | 41                         | 41             | 100                      | 2,4          |
| 03-12-x10-4 | 3             | 22<br>7<br>7               | 36             | 100                      | 8,3          |
| 03-12-x10-5 | 1             | 12<br>1                    | 13             | 92,3                     | 7,7          |
| 03-12-x10-6 | 1             | 28                         | 28             | 100                      | 3,6          |
| 03-12-x10-7 | 1             | 6<br>1                     | 7              | 85,7                     | 14,3         |



Tabla A-12: Conectividad de flóculos sedimentación 8,7 (m/h) parte 1 (magnificación 50X).

| Nombre Foto | N° de Cluster | N° de flóculos por Cluster                                                      | N° de flóculos | % de flóculos conectados | % de Cluster |
|-------------|---------------|---------------------------------------------------------------------------------|----------------|--------------------------|--------------|
| 10-12-x5-1  | 10            | 2<br>4<br>5<br>1<br>5<br>4<br>2<br>5<br>2<br>1<br>4<br>3<br>1                   | 39             | 92,3                     | 25,6         |
| 10-12-x5-2  | 10            | 1<br>1<br>4<br>1<br>2<br>4<br>11<br>18<br>10<br>1<br>2<br>2<br>1<br>1<br>2<br>3 | 64             | 90,6                     | 15,6         |

Tabla A-13: Conectividad de flóculos sedimentación 8,7 (m/h) parte 2 (magnificación 50X).

| Nombre Foto | N° de Cluster | N° de flóculos por Cluster                                                                  | N° de flóculos | % de flóculos conectados | % de Cluster |
|-------------|---------------|---------------------------------------------------------------------------------------------|----------------|--------------------------|--------------|
| 10-12-x5-3  | 12            | 6<br>3<br>2<br>2<br>1<br>3<br>3<br>3<br>1<br>1<br>2<br>1<br>1<br>4<br>5<br>2<br>1<br>1<br>5 | 47             | 85,1                     | 25,5         |
| 10-12-x5-4  | 5             | 5<br>1<br>5<br>1<br>11<br>4<br>1<br>1<br>2                                                  | 31             | 87,1                     | 16,1         |

Tabla A-14: Conectividad de flóculos sedimentación 8,7 (m/h) parte 3 (magnificación 50X).

| Nombre Foto | N° de Cluster | N° de flóculos por Cluster                                                              | N° de flóculos | % de flóculos conectados | % de Cluster |
|-------------|---------------|-----------------------------------------------------------------------------------------|----------------|--------------------------|--------------|
| 10-12-x5-5  | 10            | 1<br>3<br>2<br>1<br>6<br>1<br>11<br>1<br>2<br>4<br>1<br>2<br>3<br>1<br>2<br>4<br>1<br>1 | 47             | 83                       | 21,3         |
| 10-12-x5-6  | 5             | 4<br>5<br>1<br>18<br>4<br>3                                                             | 35             | 97,1                     | 14,3         |
| 10-12-x5-7  | 1             | 1<br>35                                                                                 | 36             | 97,2                     | 2,8          |
| 10-12-x5-8  | 5             | 2<br>18<br>1<br>2<br>6<br>3                                                             | 32             | 96,9                     | 15,6         |

Tabla A-15: Conectividad de flóculos sedimentación 8,7 (m/h) (magnificación 100X).

| Nombre Foto | N° de Cluster | N° de flóculos por Cluster                            | N° de flóculos | % de flóculos conectados | % de cluster |
|-------------|---------------|-------------------------------------------------------|----------------|--------------------------|--------------|
| 10-12-x10-1 | 3             | 5<br>5<br>1<br>1<br>1<br>1<br>2                       | 16             | 75,0                     | 18,8         |
| 10-12-x10-2 | 3             | 6<br>7<br>2<br>1<br>1                                 | 17             | 88,2                     | 17,6         |
| 10-12-x10-3 | 7             | 4<br>2<br>20<br>10<br>1<br>2<br>1<br>5<br>1<br>1<br>2 | 49             | 91,8                     | 14,3         |
| 10-12-x10-4 | 5             | 4<br>13<br>10<br>3<br>2                               | 32             | 100,0                    | 15,6         |
| 10-12-x10-5 | 1             | 17<br>1                                               | 18             | 94,4                     | 5,6          |

Tabla A-16: Conectividad de flóculos sedimentación 41,8 (m/h) (magnificación 50X).

| Nombre Foto | N° de Cluster | N° de flóculos por Cluster                | N° de flóculos | % de flóculos conectados | % de cluster |
|-------------|---------------|-------------------------------------------|----------------|--------------------------|--------------|
| 17-12-x5-1  | 7             | 5<br>4<br>2<br>3<br>3<br>2<br>1<br>4      | 24             | 95,8                     | 29,2         |
| 17-12-x5-2  | 2             | 6<br>4<br>1                               | 11             | 90,9                     | 18,2         |
| 17-12-x5-3  | 5             | 4<br>3<br>1<br>1<br>5<br>3<br>1<br>1<br>3 | 22             | 81,8                     | 22,7         |
| 17-12-x5-4  | 1             | 10                                        | 10             | 100,0                    | 10,0         |
| 17-12-x5-5  | 3             | 17<br>2<br>3                              | 22             | 100,0                    | 13,6         |
| 17-12-x5-6  | 2             | 6<br>14                                   | 20             | 100,0                    | 10,0         |
| 17-12-x5-7  | 7             | 8<br>2<br>3<br>2<br>9<br>3<br>8           | 35             | 100,0                    | 20,0         |
| 17-12-x5-8  | 4             | 2<br>3<br>3<br>1<br>11                    | 20             | 95,0                     | 20,0         |

Tabla A-17: Conectividad de flóculos sedimentación 41,8 (m/h) (magnificación 100X).

| Nombre Foto | N° de Cluster | N° de flóculos por Cluster                | N° de flóculos | % de flóculos conectados | % de cluster |
|-------------|---------------|-------------------------------------------|----------------|--------------------------|--------------|
| 17-12-x10-1 | 2             | 1<br>1<br>1<br>1<br>2<br>1<br>6           | 13             | 61,5                     | 15,4         |
| 17-12-x10-2 | 0             | 1<br>1<br>1                               | 3              | 0,0                      | 0,0          |
| 17-12-x10-3 | 3             | 5<br>2<br>4<br>1<br>1<br>1<br>1<br>1<br>1 | 16             | 68,8                     | 18,8         |
| 17-12-x10-4 | 1             | 12                                        | 12             | 100,0                    | 8,3          |
| 17-12-x10-5 | 1             | 17<br>1                                   | 18             | 94,4                     | 5,6          |
| 17-12-x10-6 | 3             | 7<br>18<br>2                              | 27             | 100,0                    | 11,1         |
| 17-12-x10-7 | 1             | 3<br>1<br>1<br>1<br>1                     | 7              | 42,9                     | 14,3         |
| 17-12-x10-8 | 1             | 3<br>1<br>1<br>1                          | 6              | 50,0                     | 16,7         |

03-12-x5-1

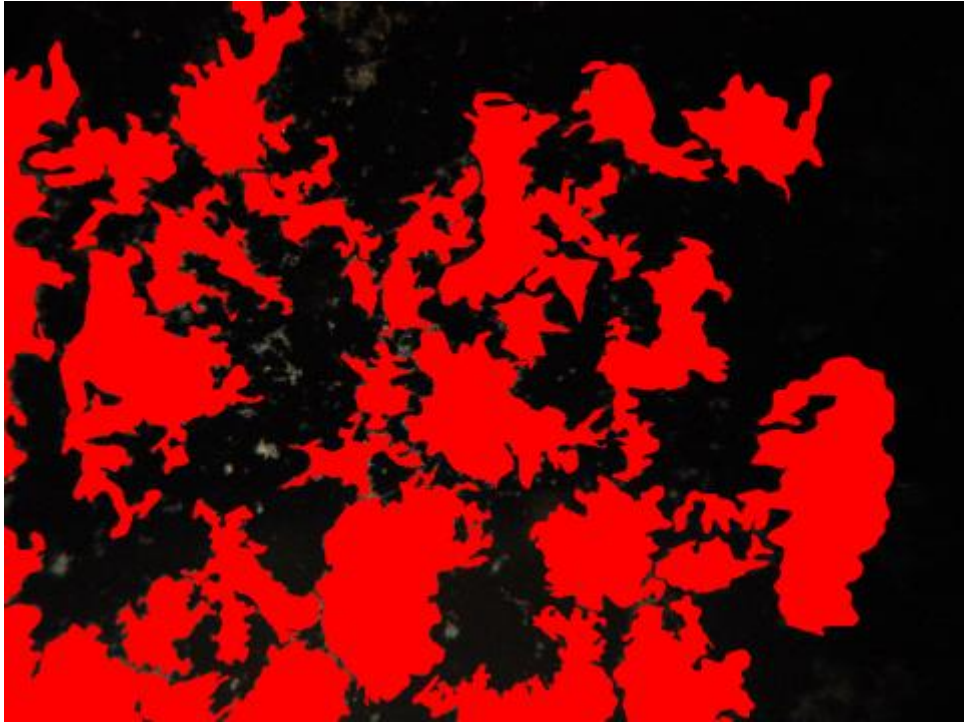

03-12-x5-2

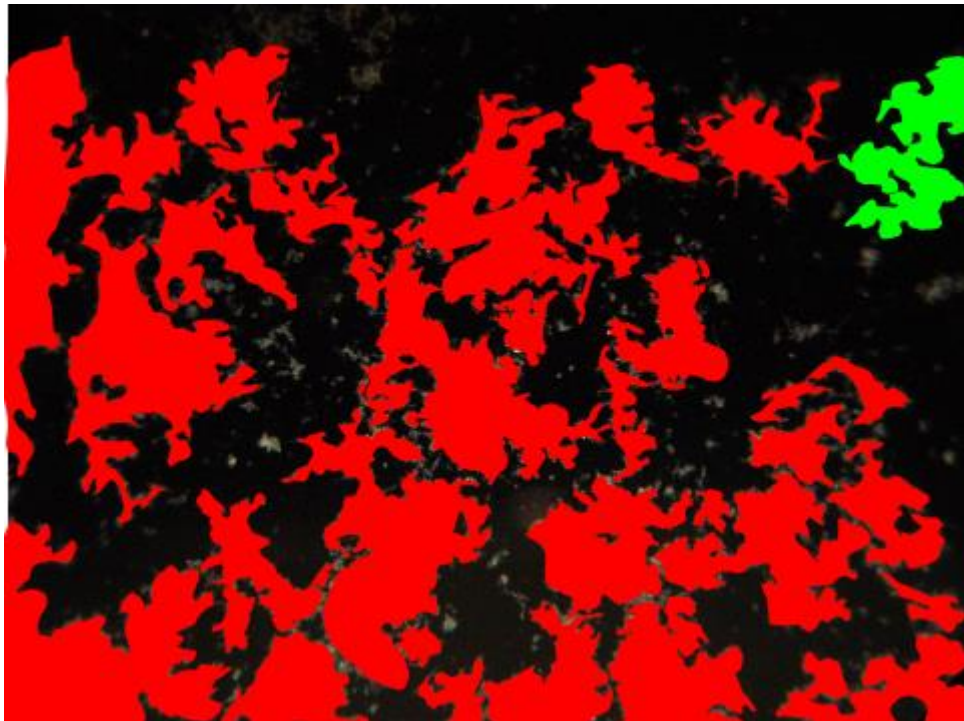

03-12-x5-3

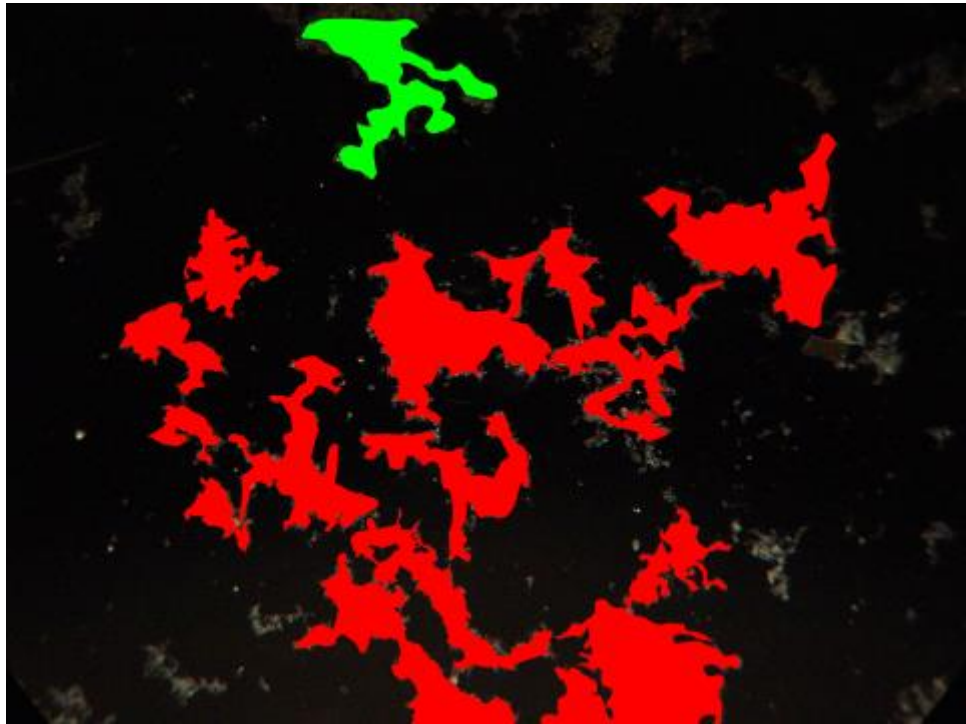

03-12-x5-4

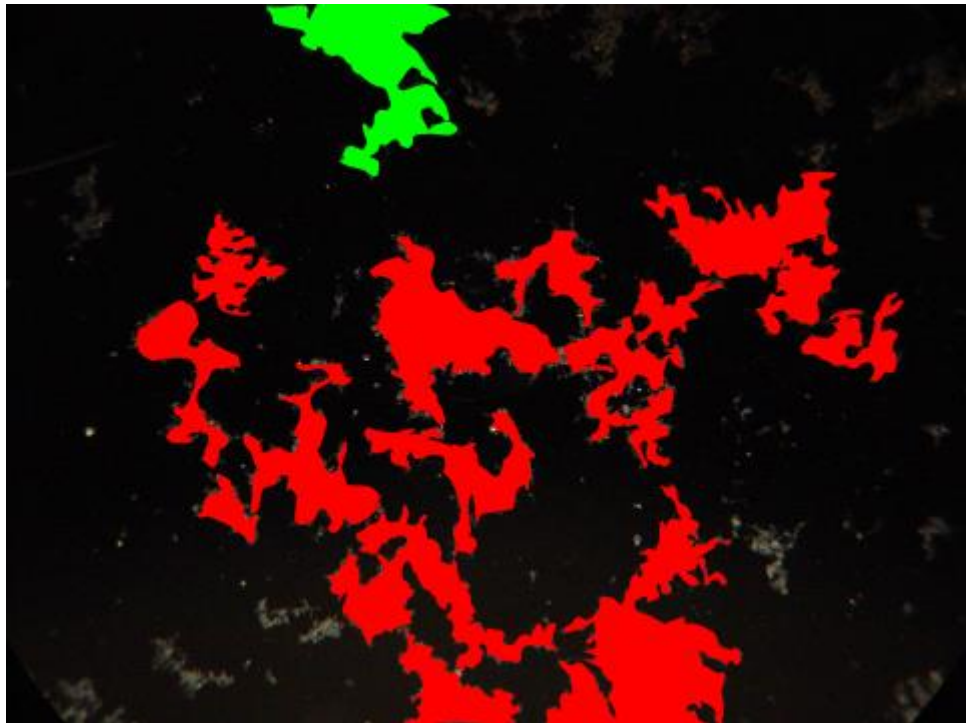



03-12-x5-5

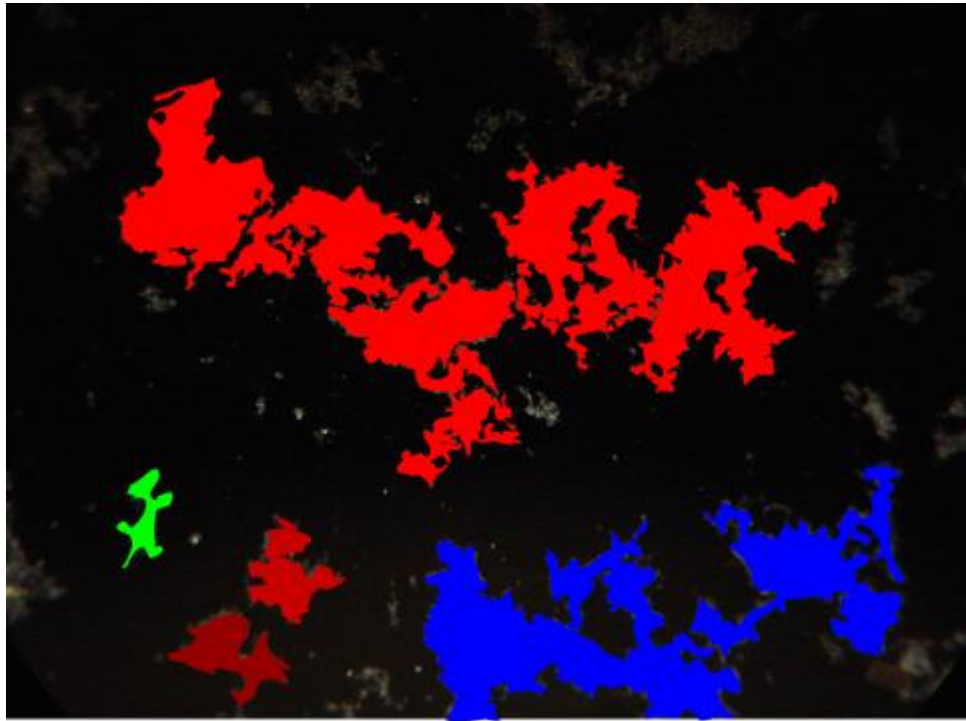

03-12-x5-6

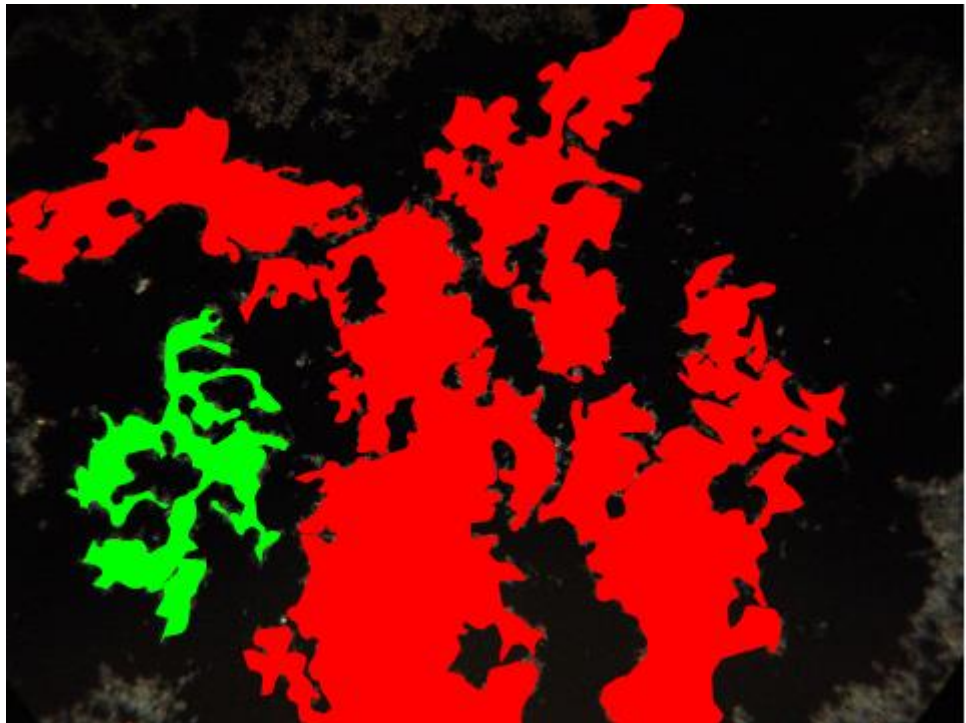

03-12-x5-7

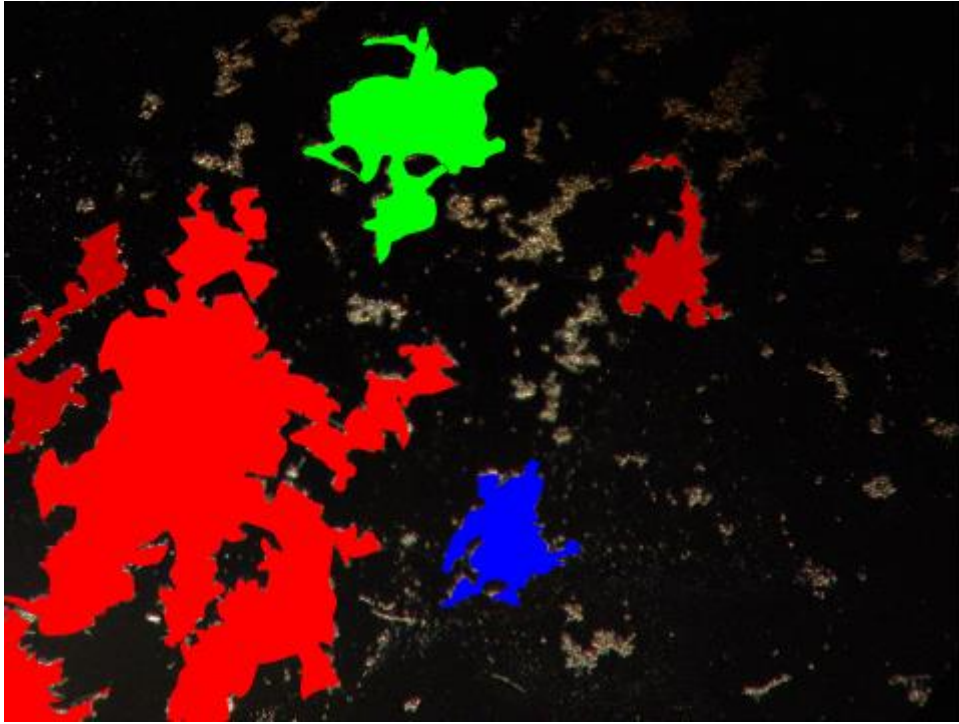

03-12-x5-8

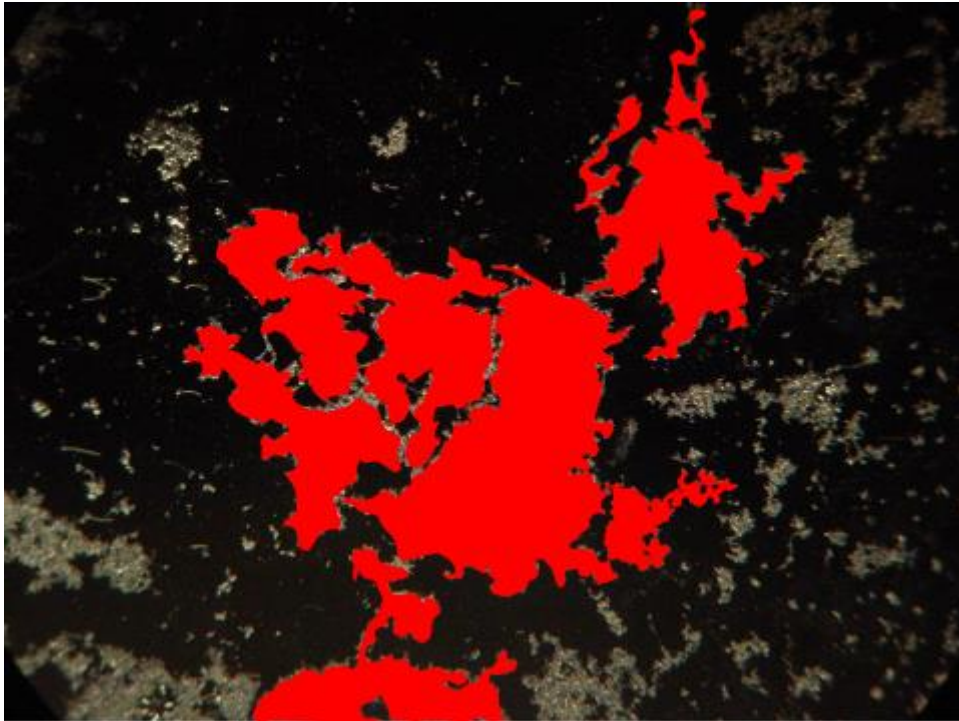

03-12-x10-1

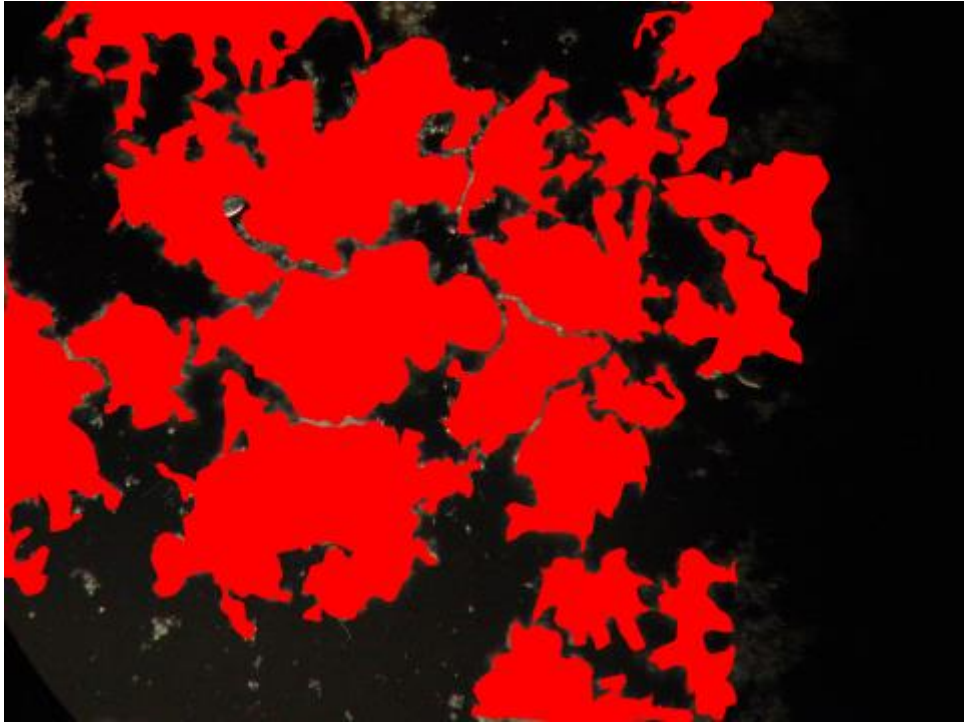

03-12-x10-2

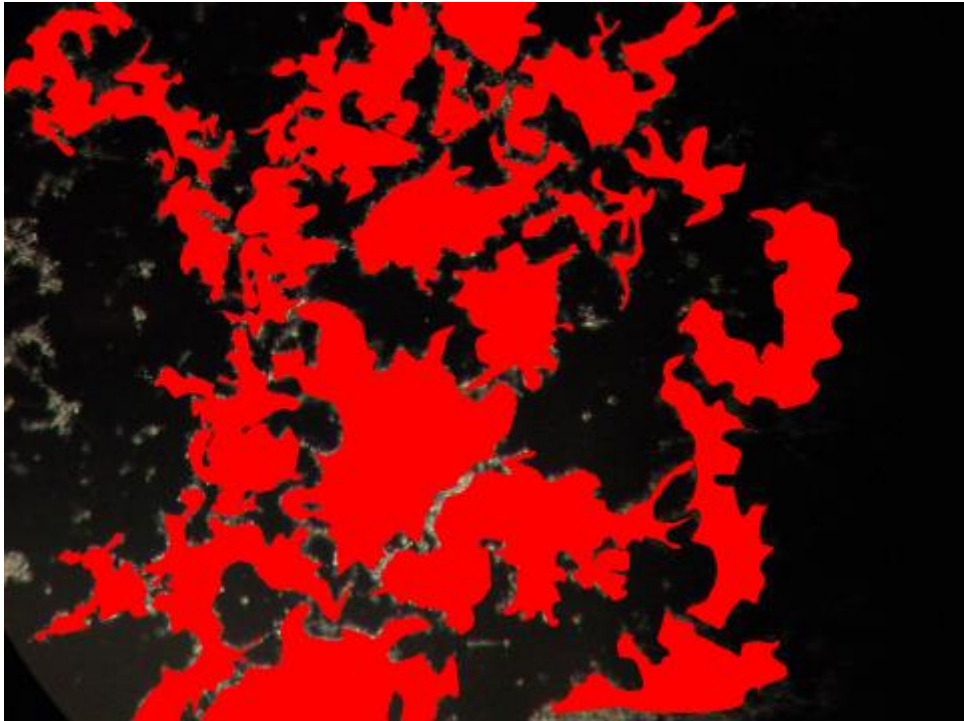



03-12-x10-3

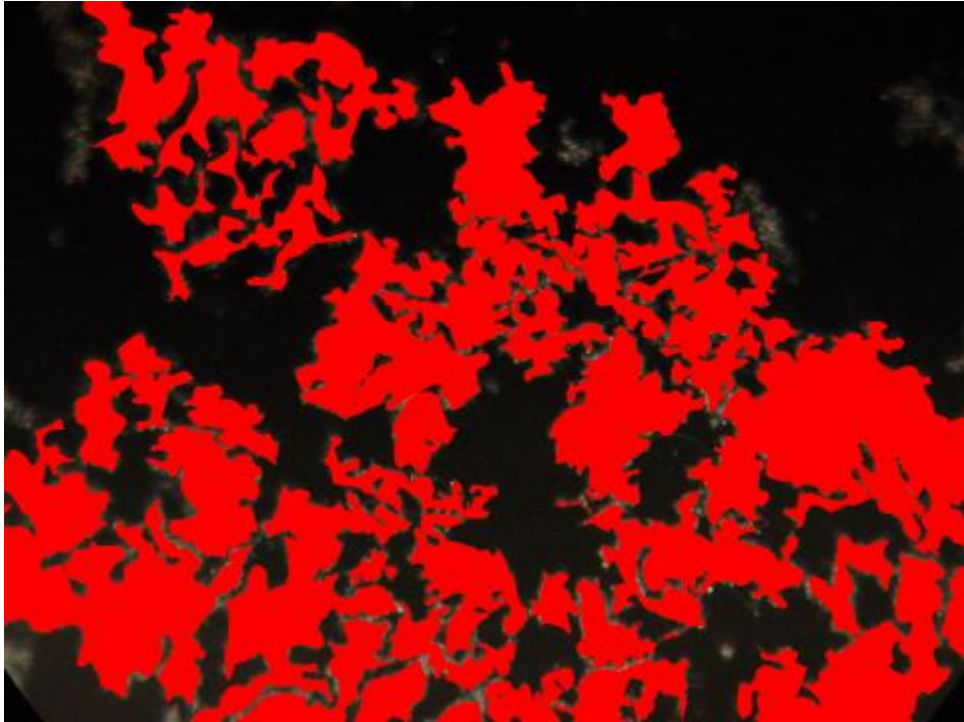

03-12-x10-4

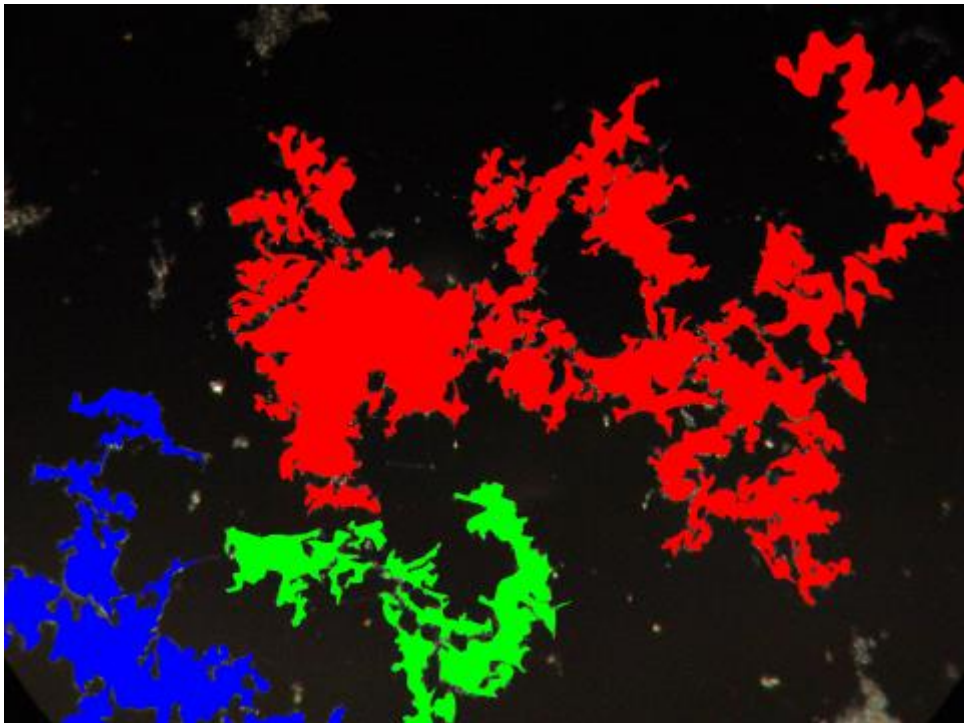

03-12-x10-5

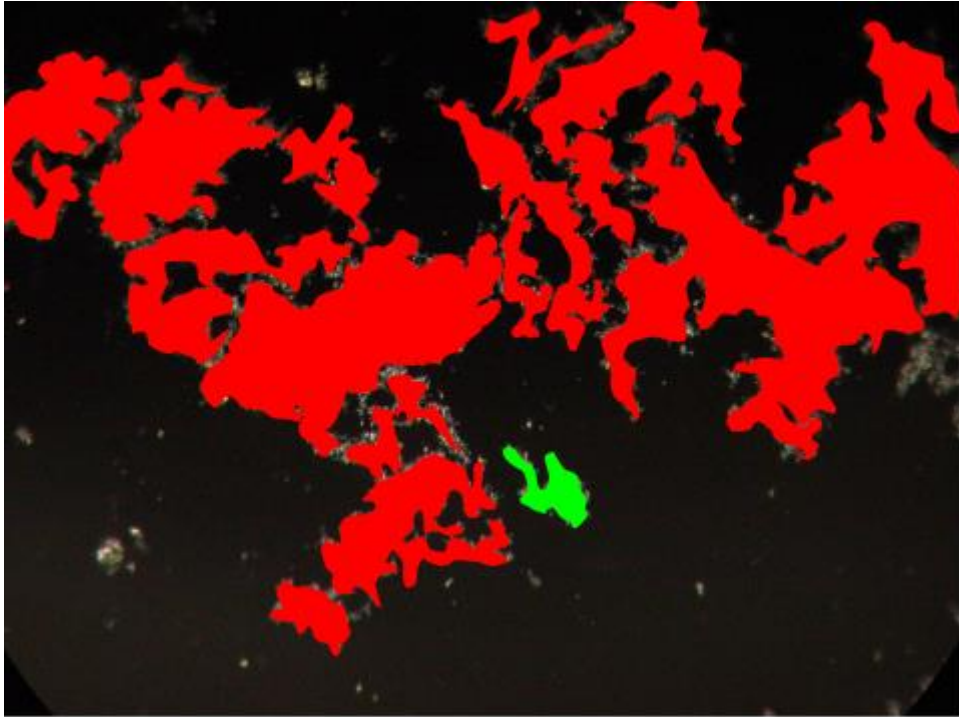

03-12-x10-6

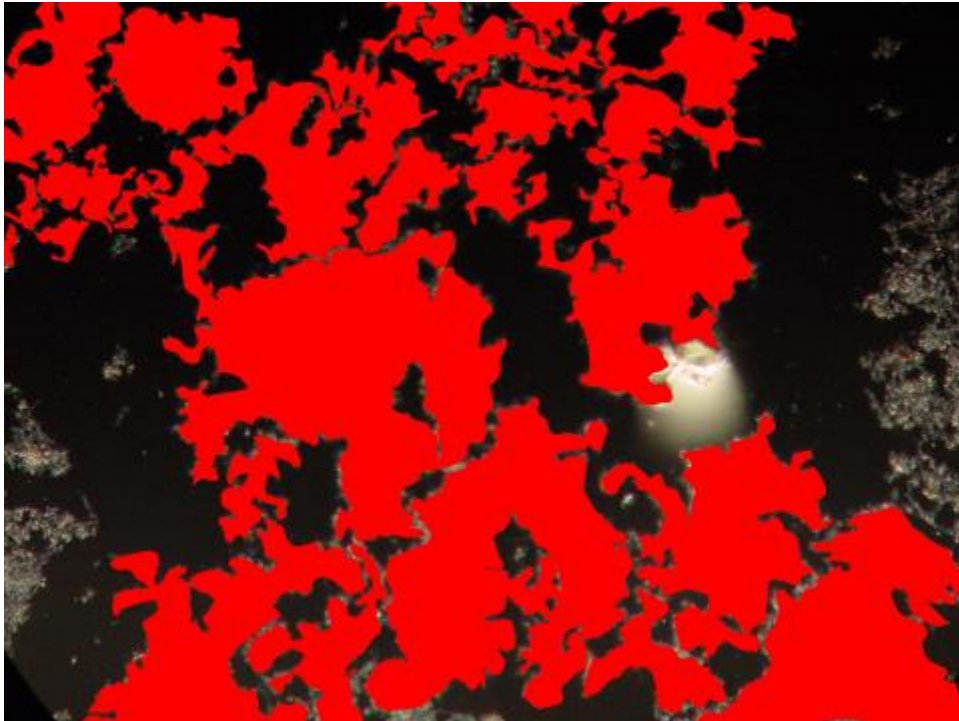

03-12-x10-7

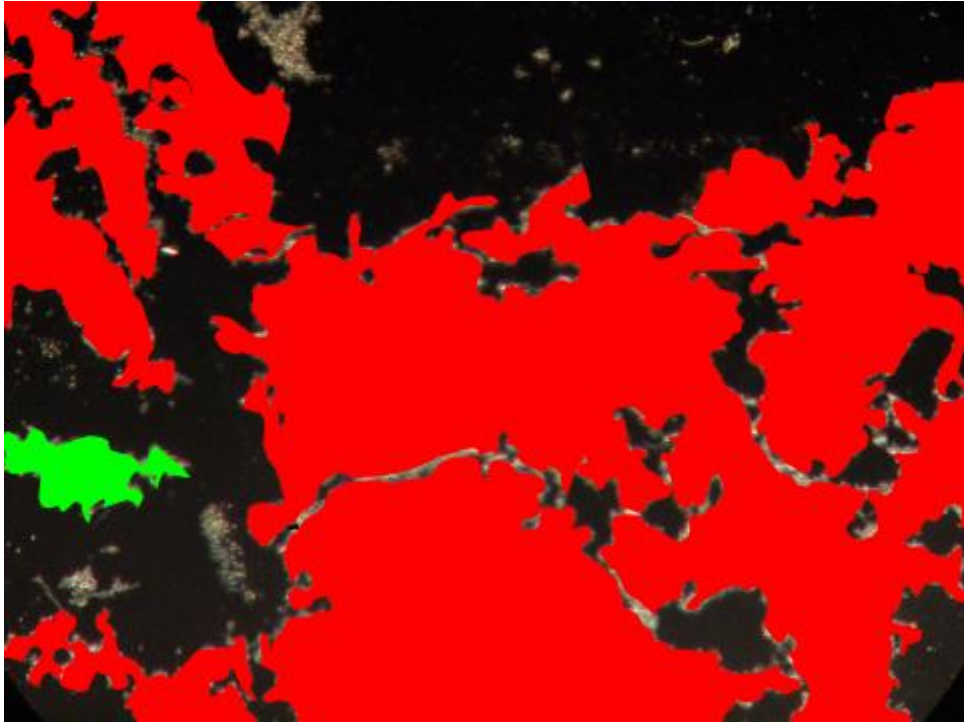

10-12-x5-1

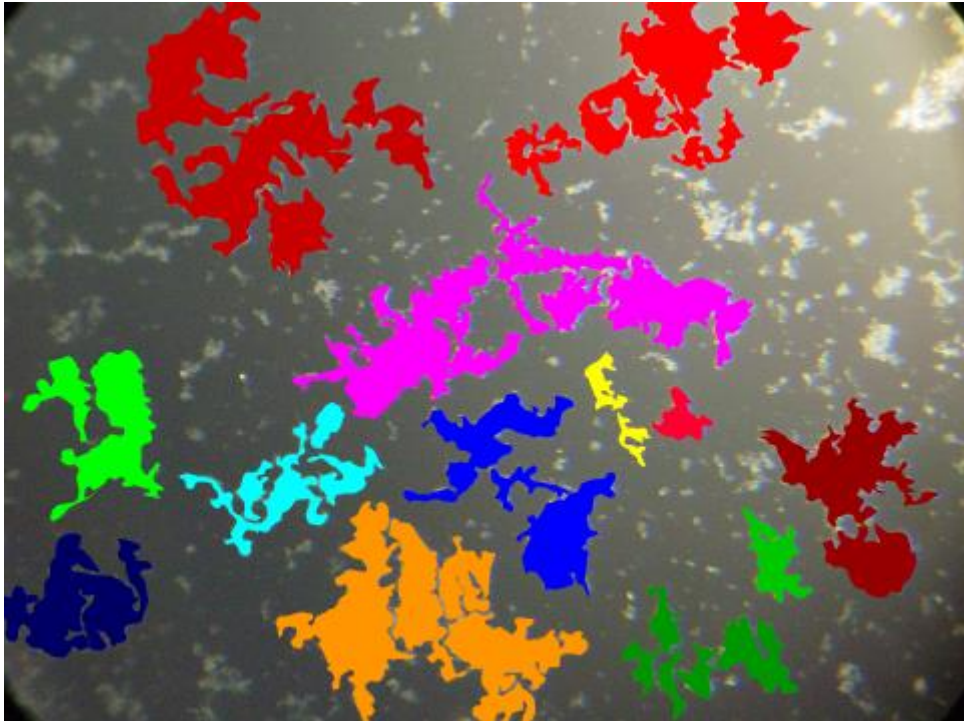



10-12-x5-2

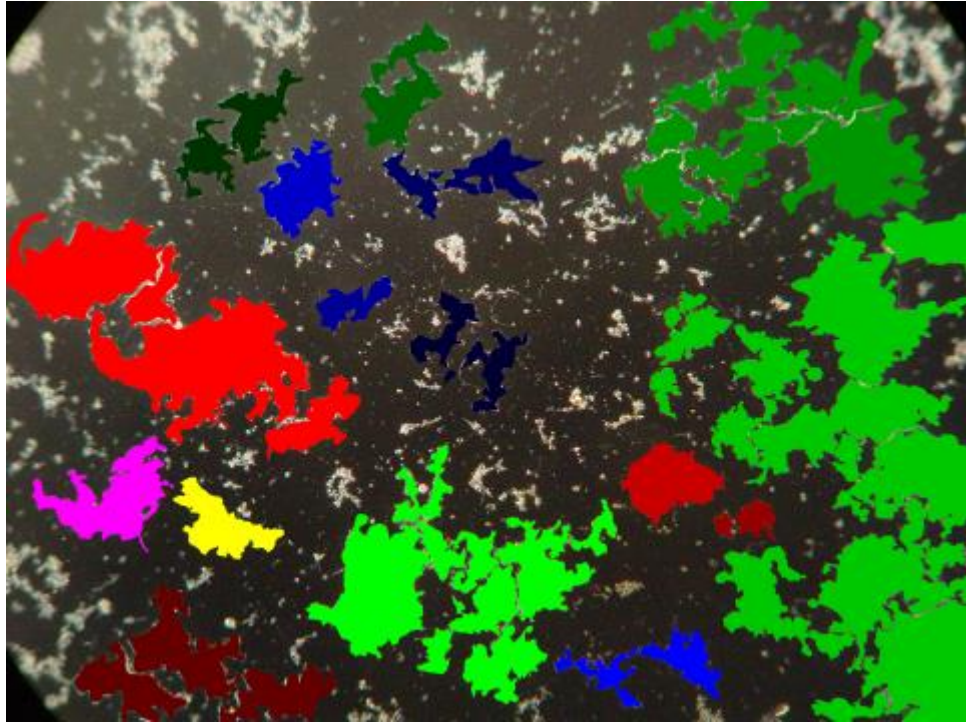

10-12-x5-3

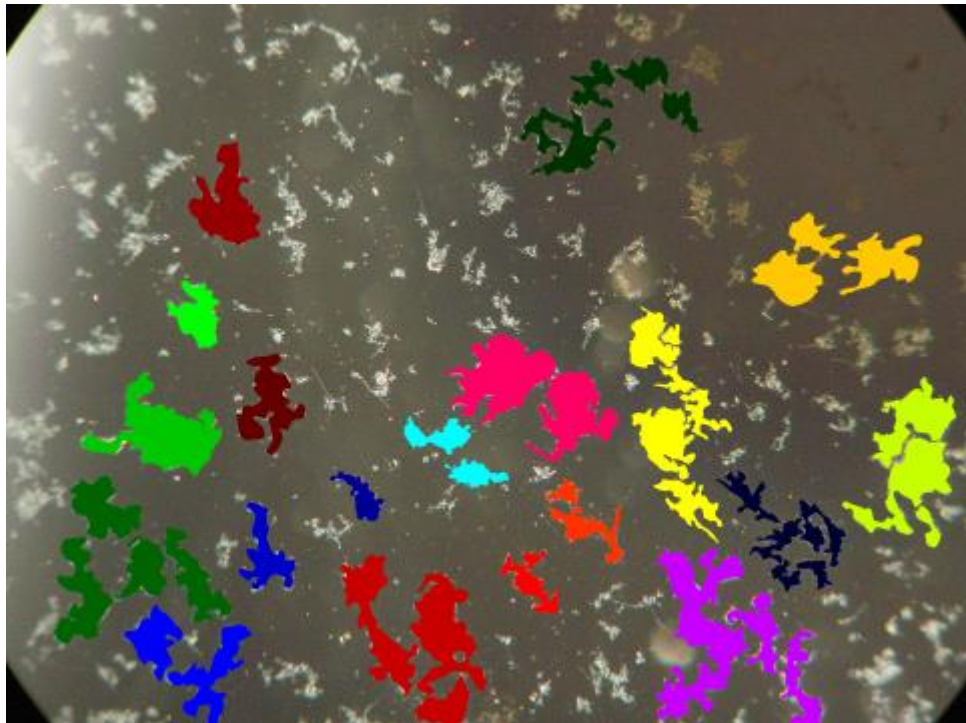

10-12-x5-4

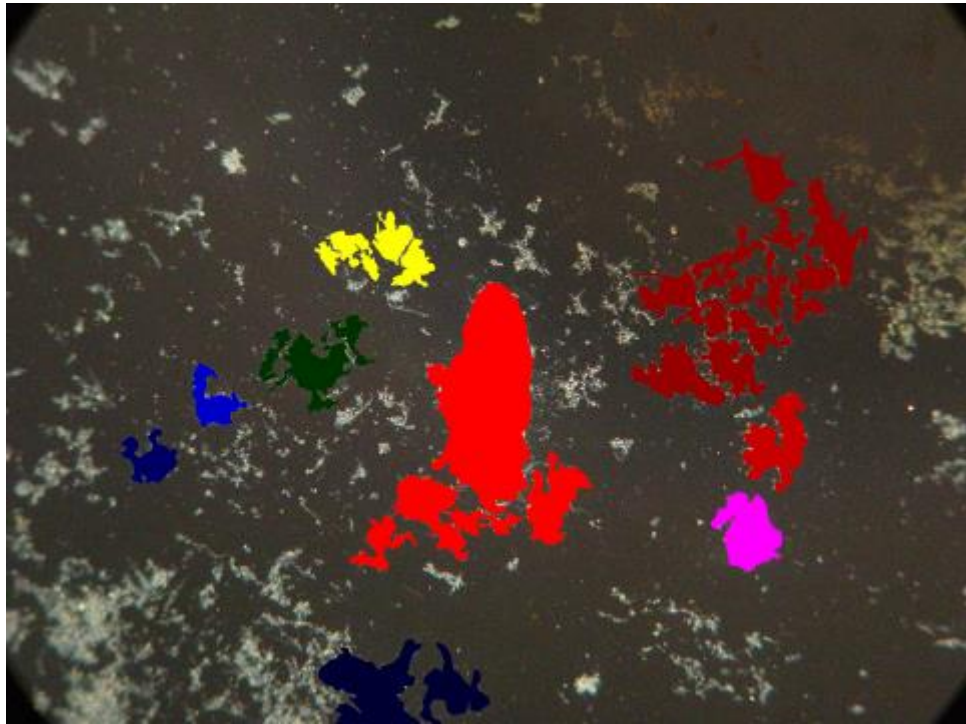

10-12-x5-5

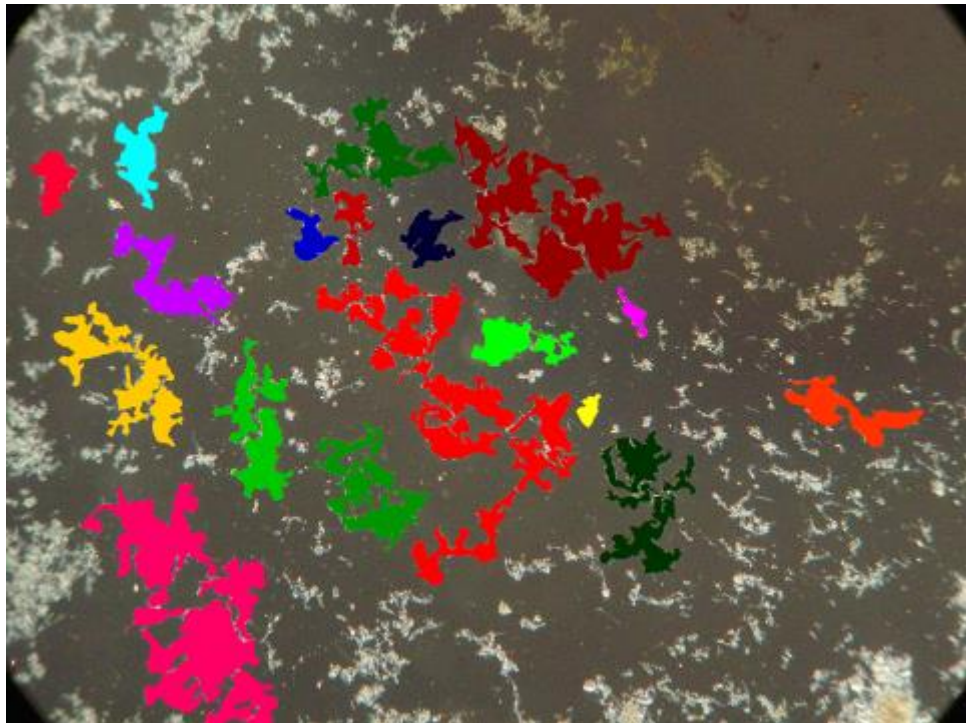



10-12-x5-6

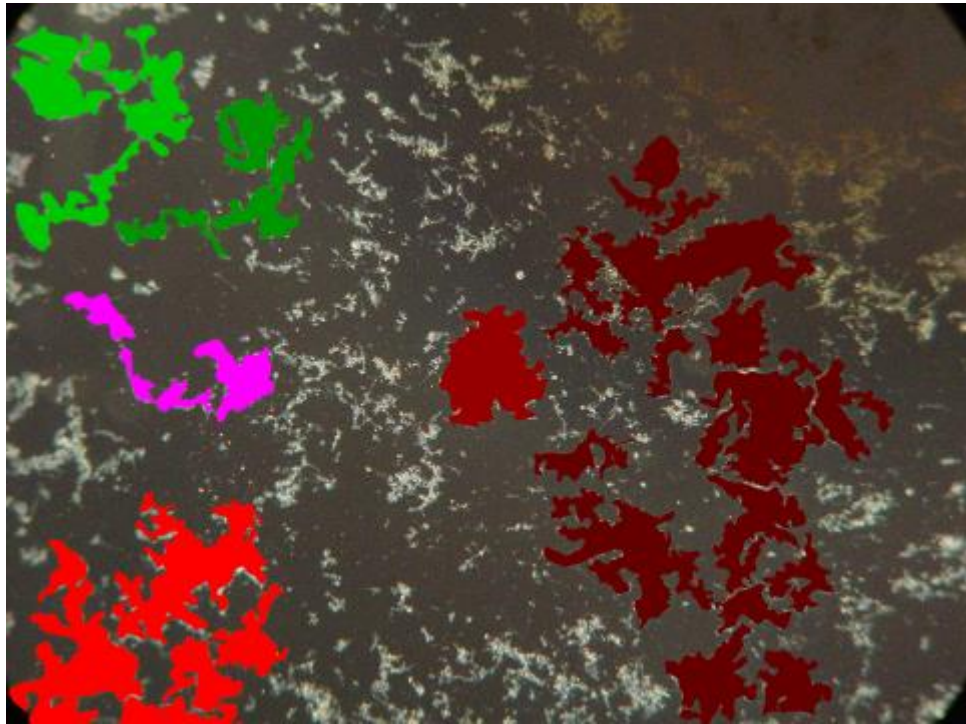

10-12-x5-7

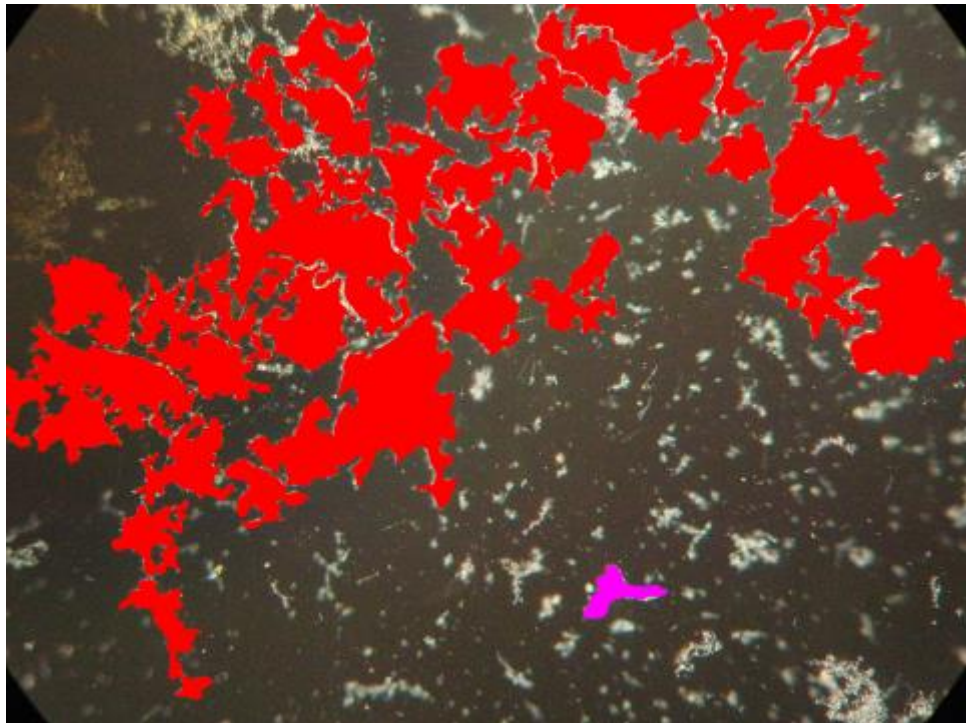

10-12-x5-8

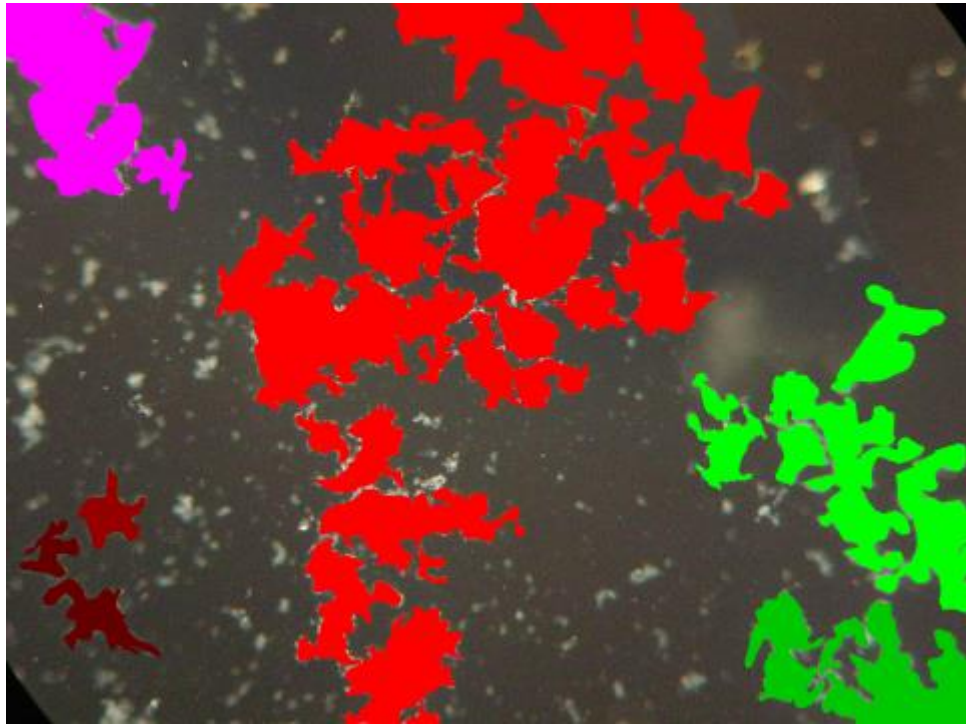

10-12-x10-1

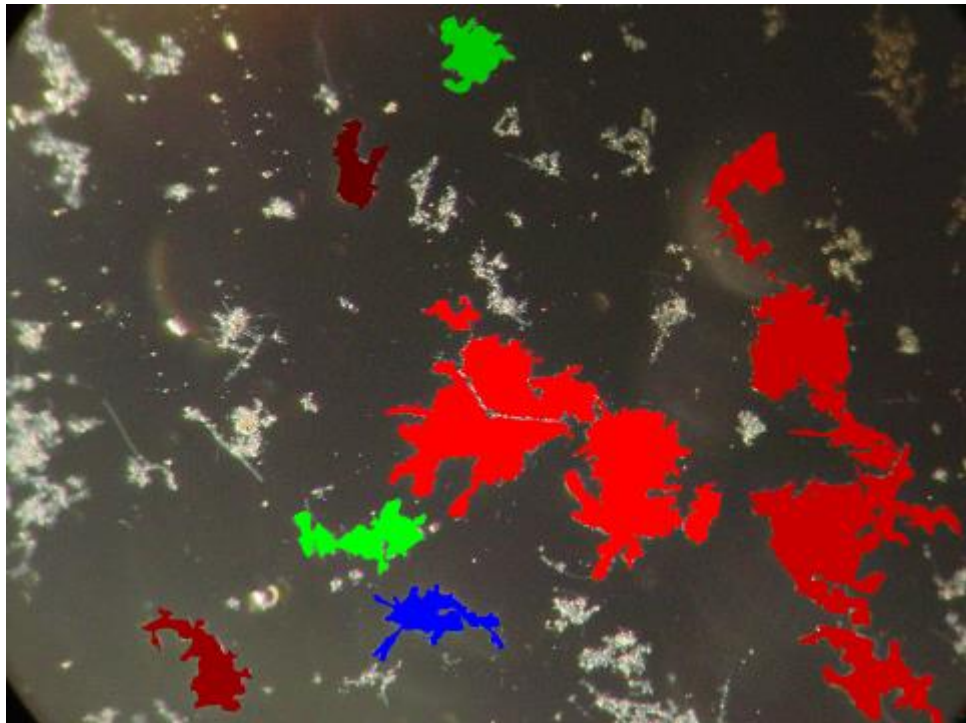



10-12-x10-2

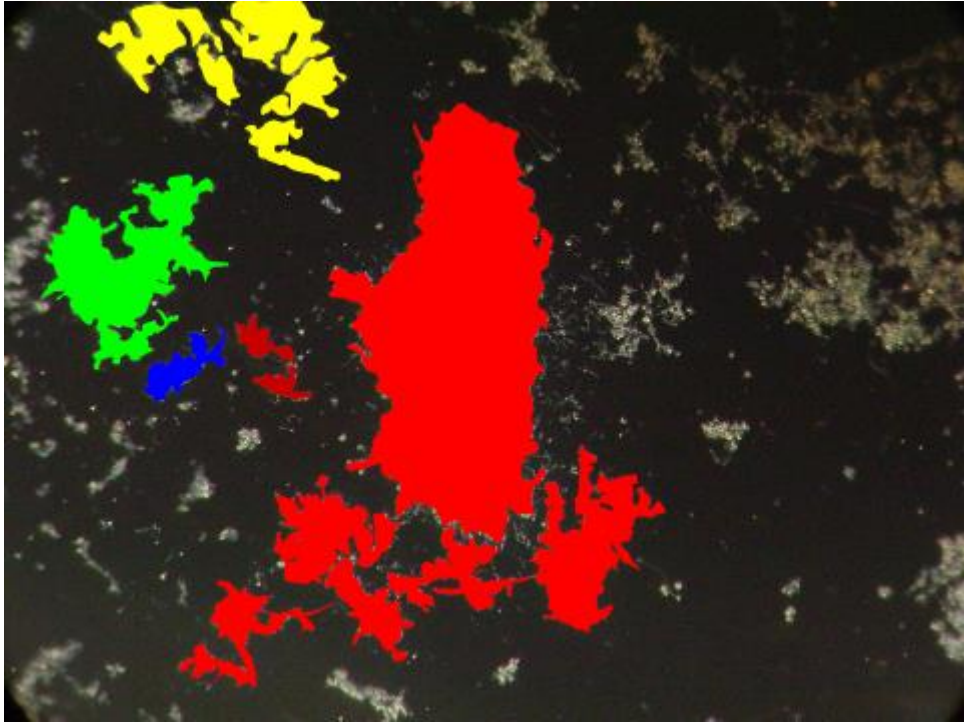

10-12-x10-3

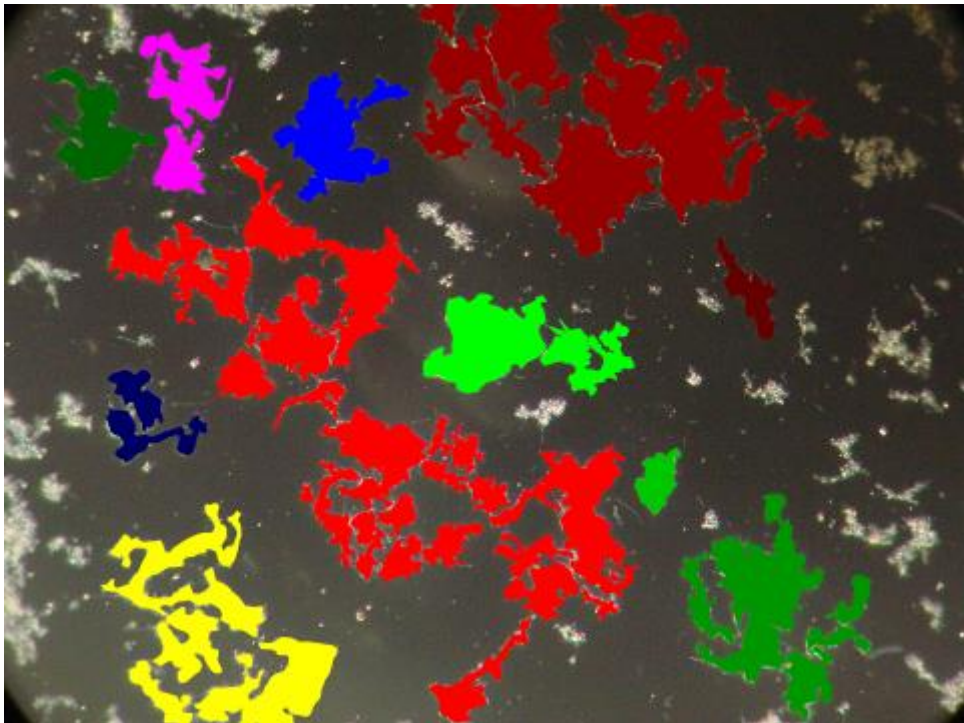

10-12-x10-4

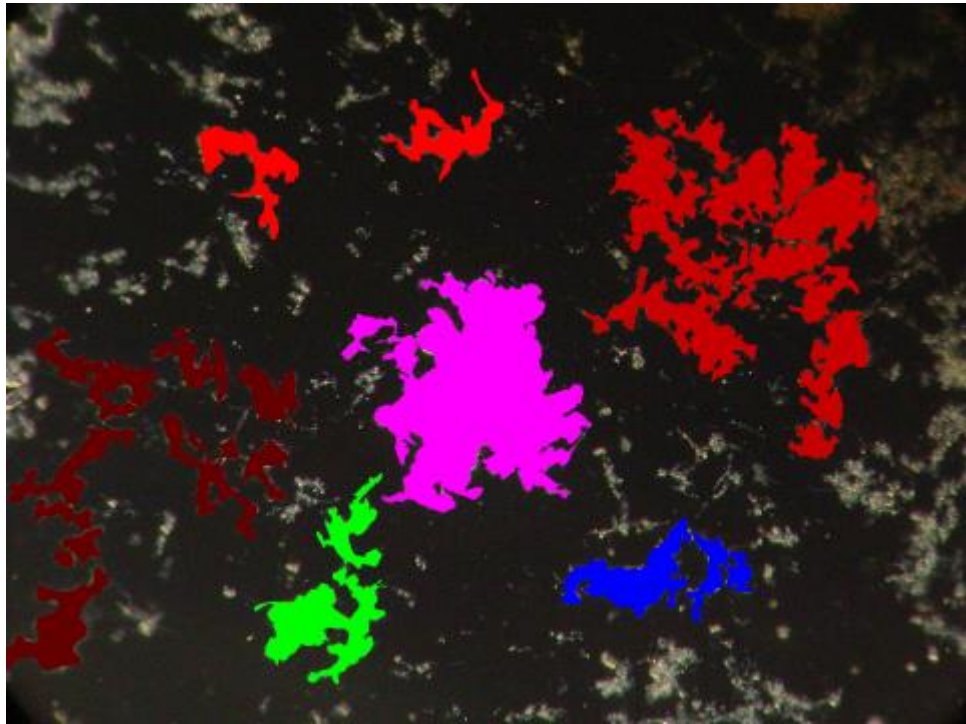

10-12-x10-5

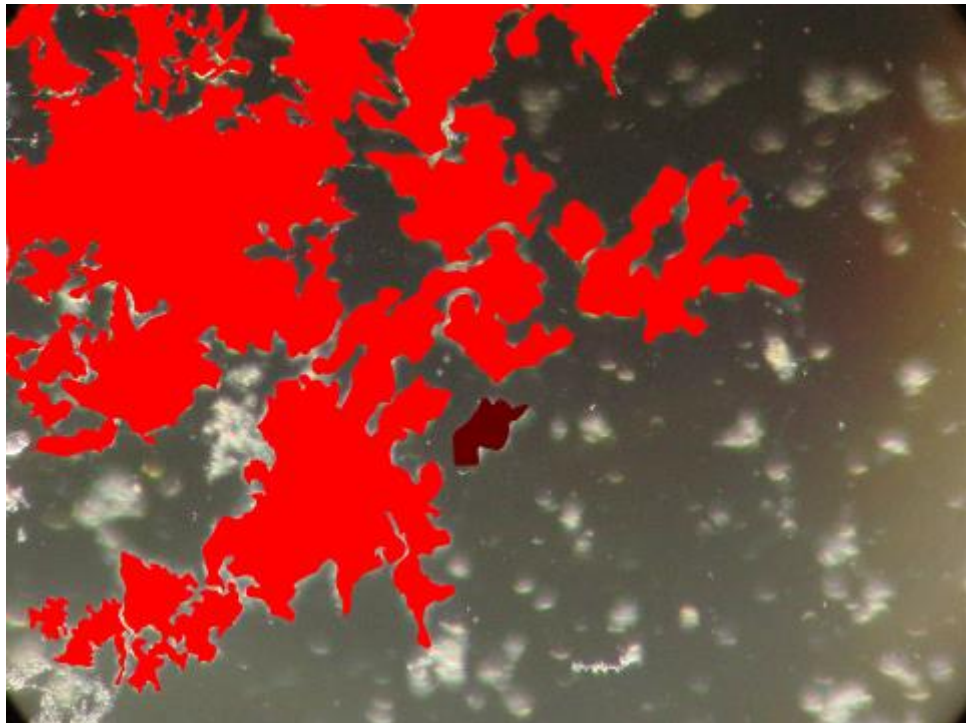

17-12-x5-1

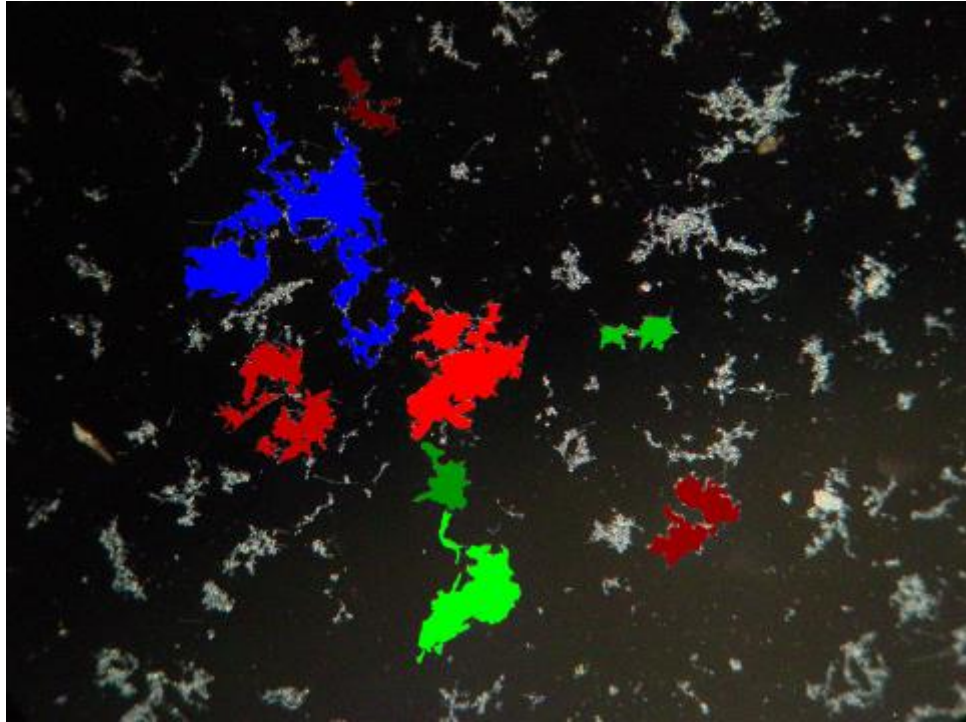

17-12-x5-2

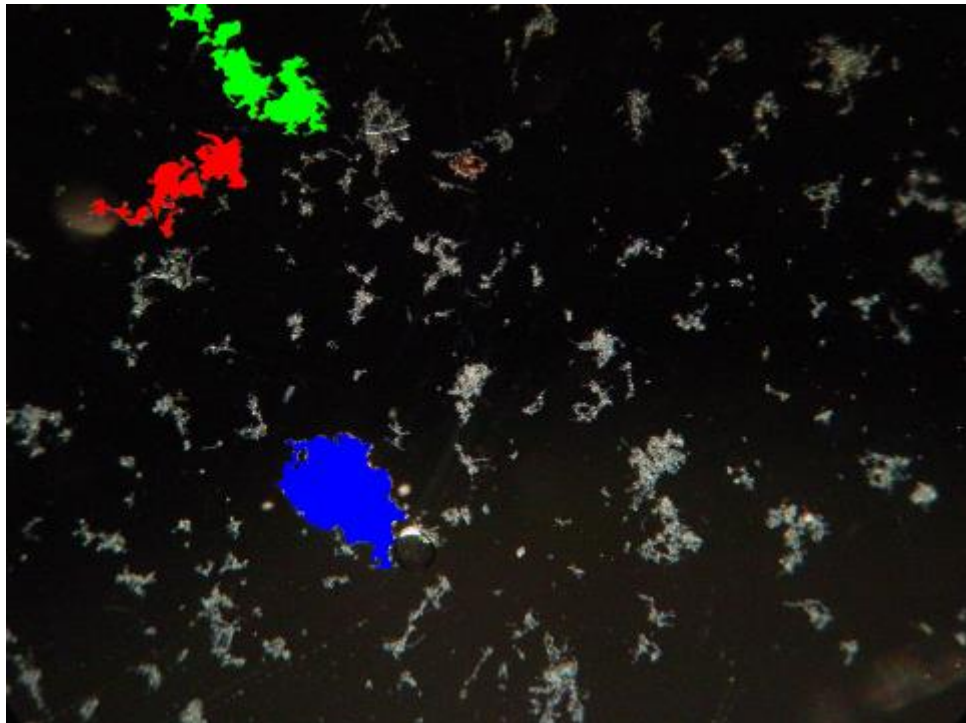



17-12-x5-3

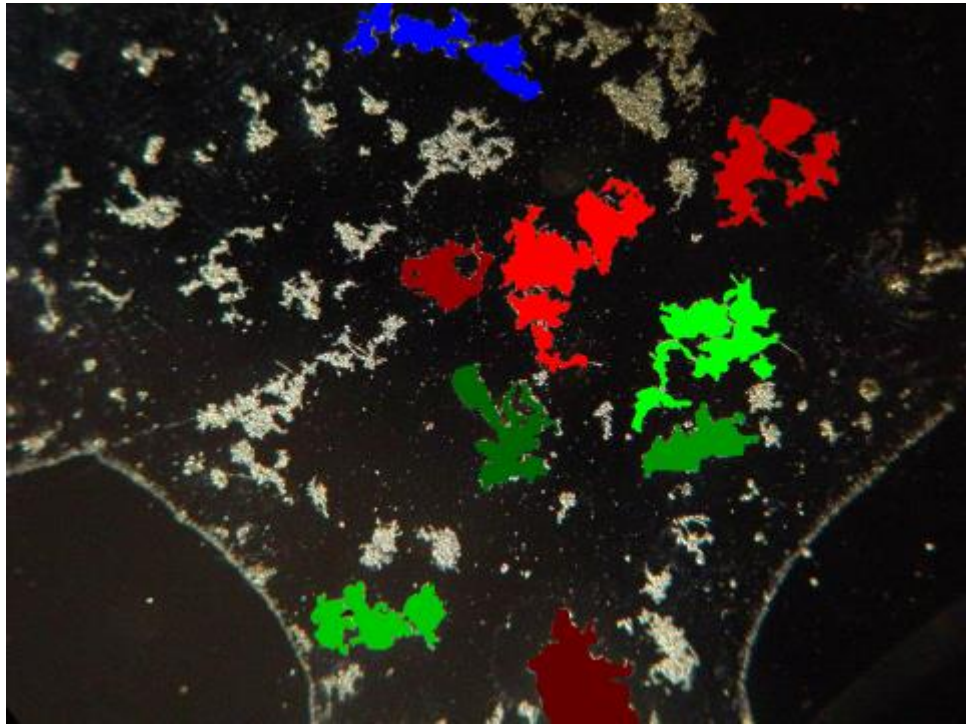

17-12-x5-4

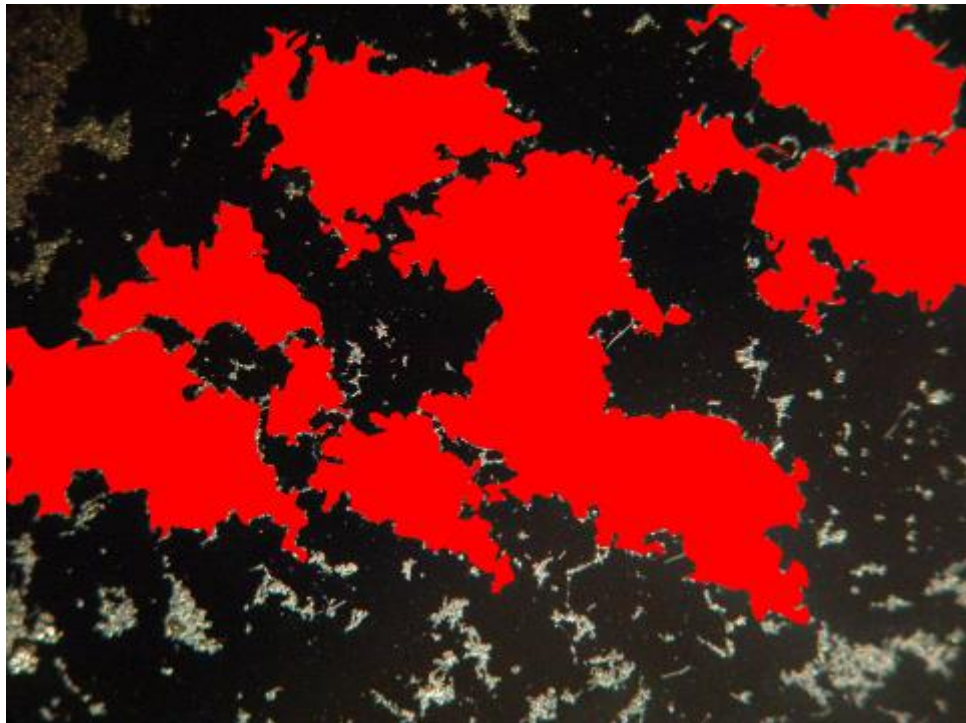

17-12-x5-5

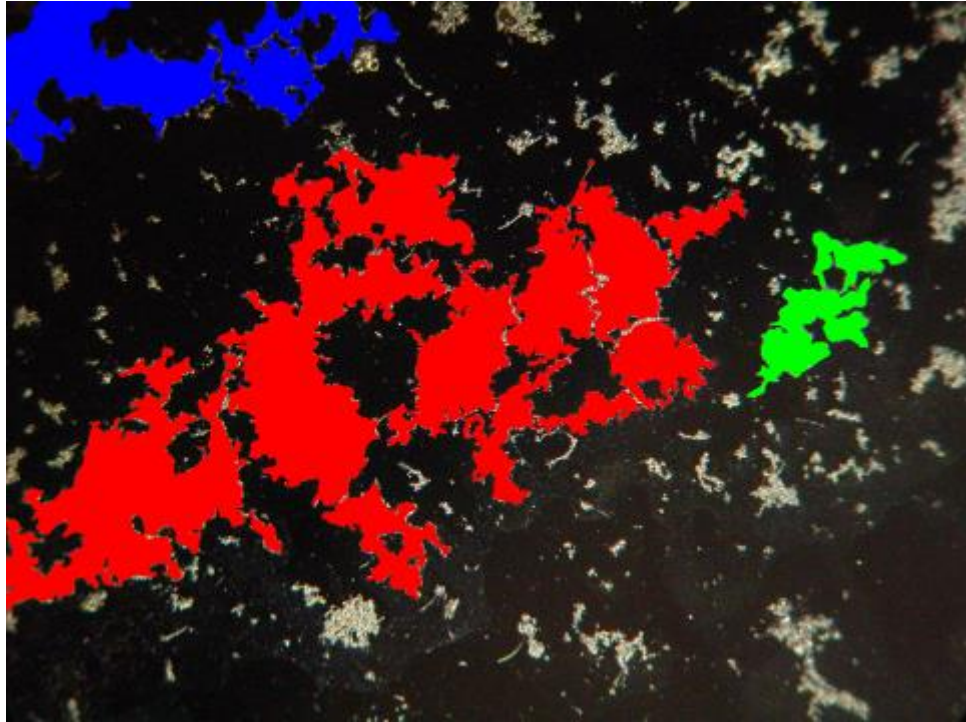

17-12-x5-6

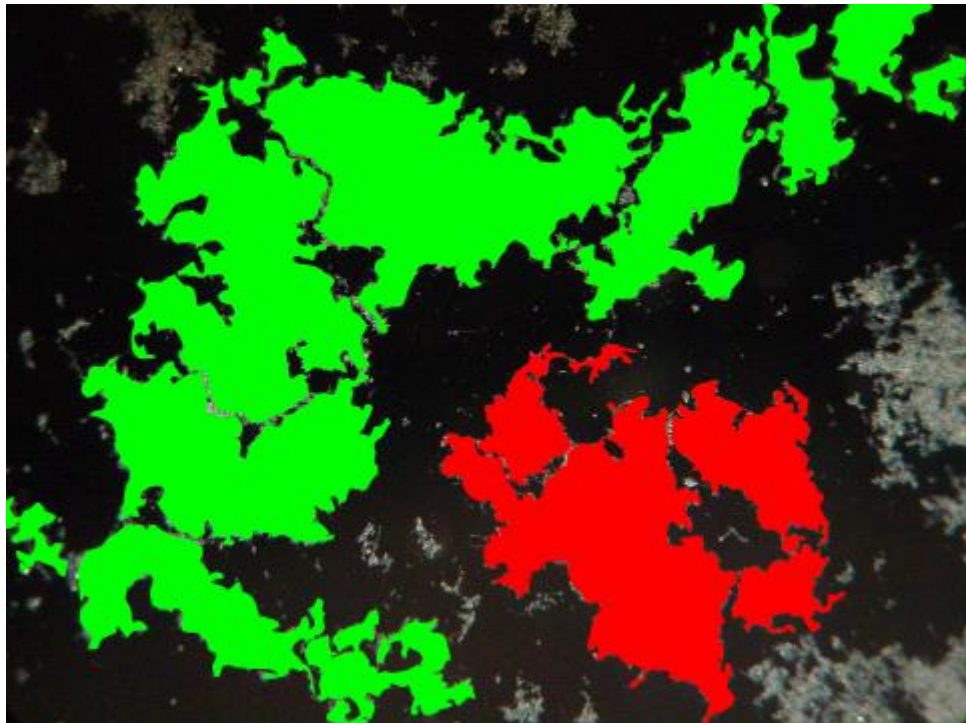



17-12-x5-7

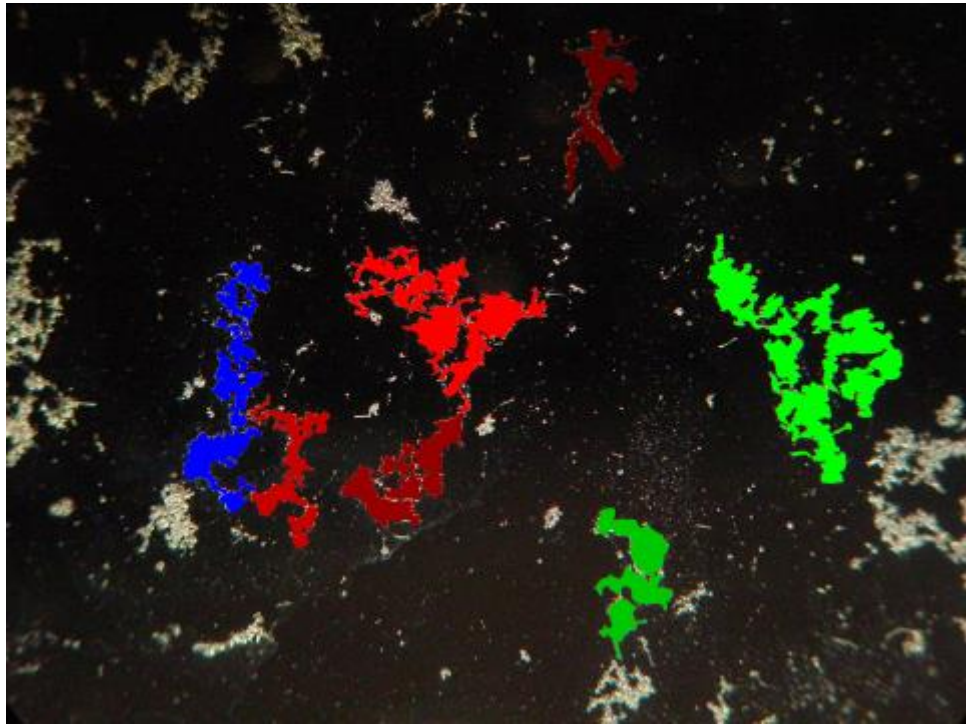

17-12-x5-8

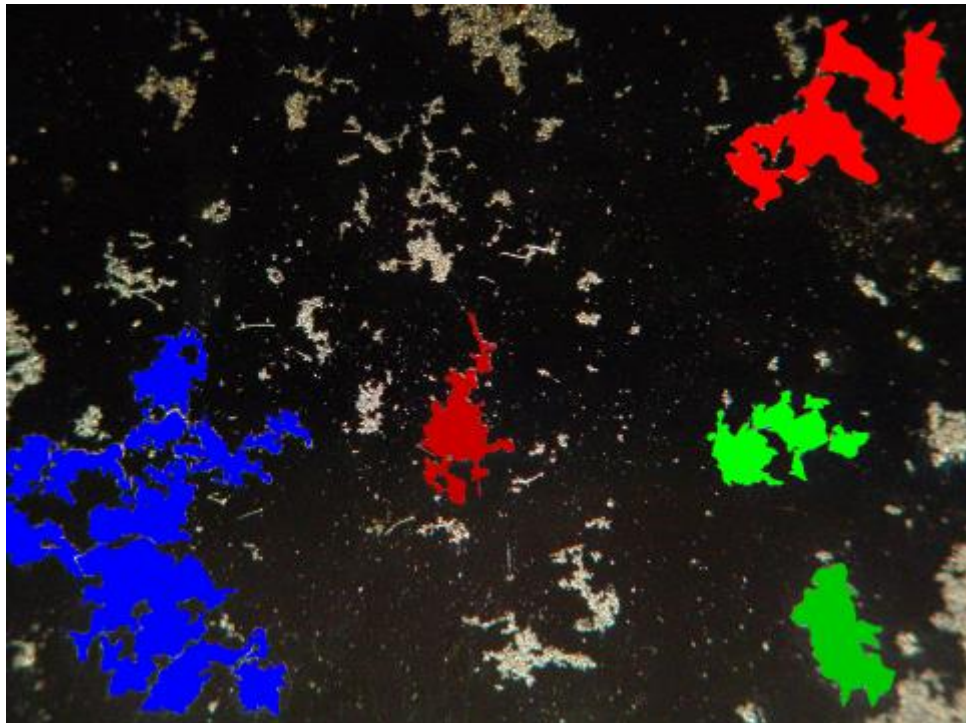



17-12-x10-1

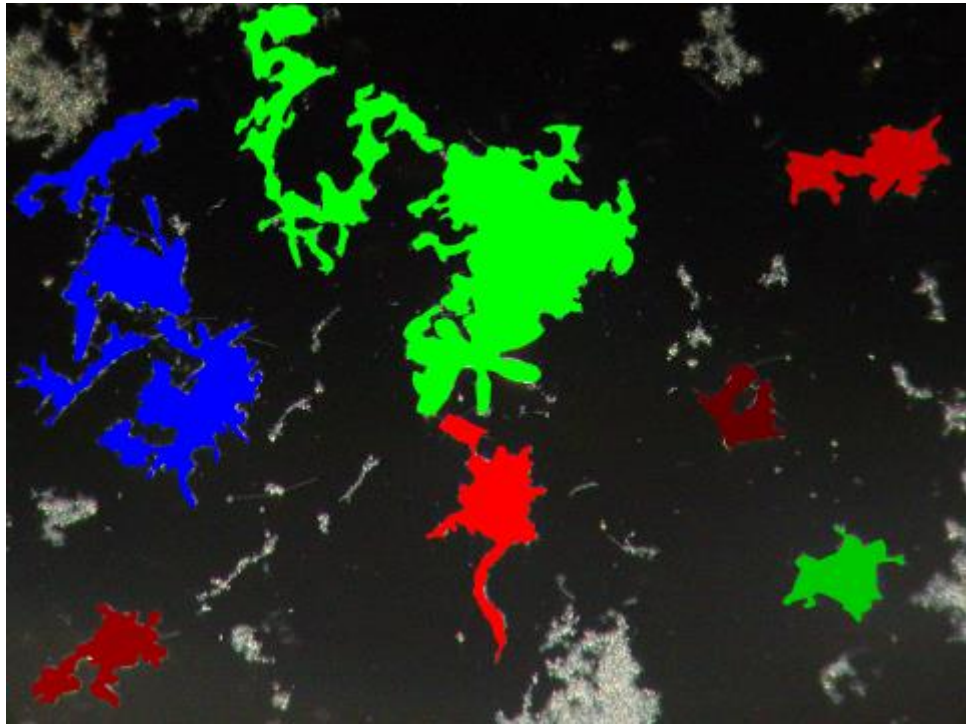

17-12-x10-2

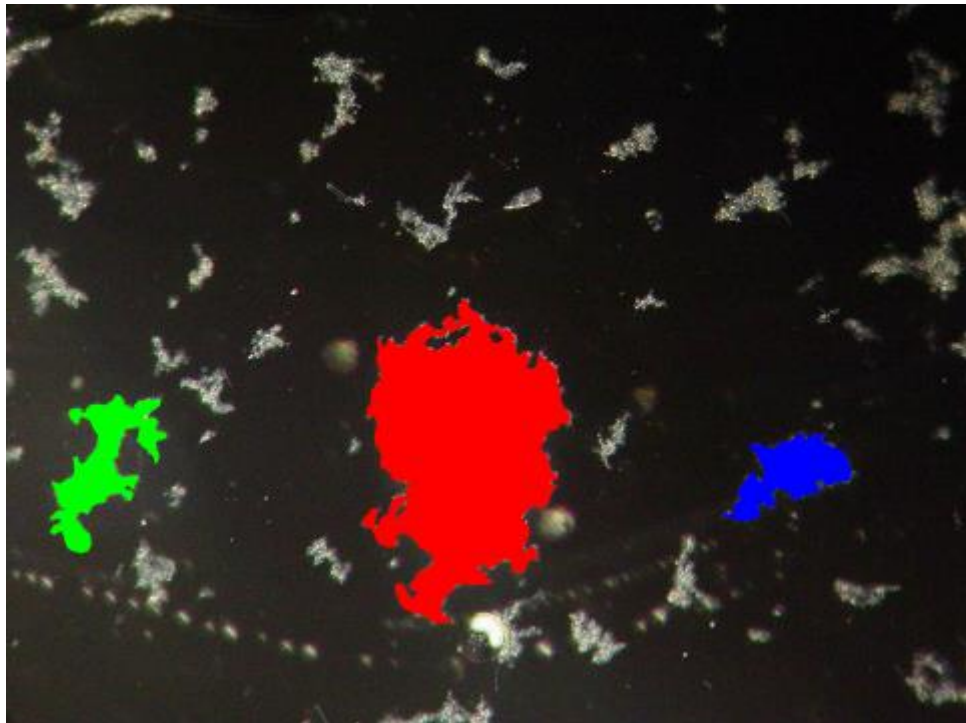

17-12-x10-3

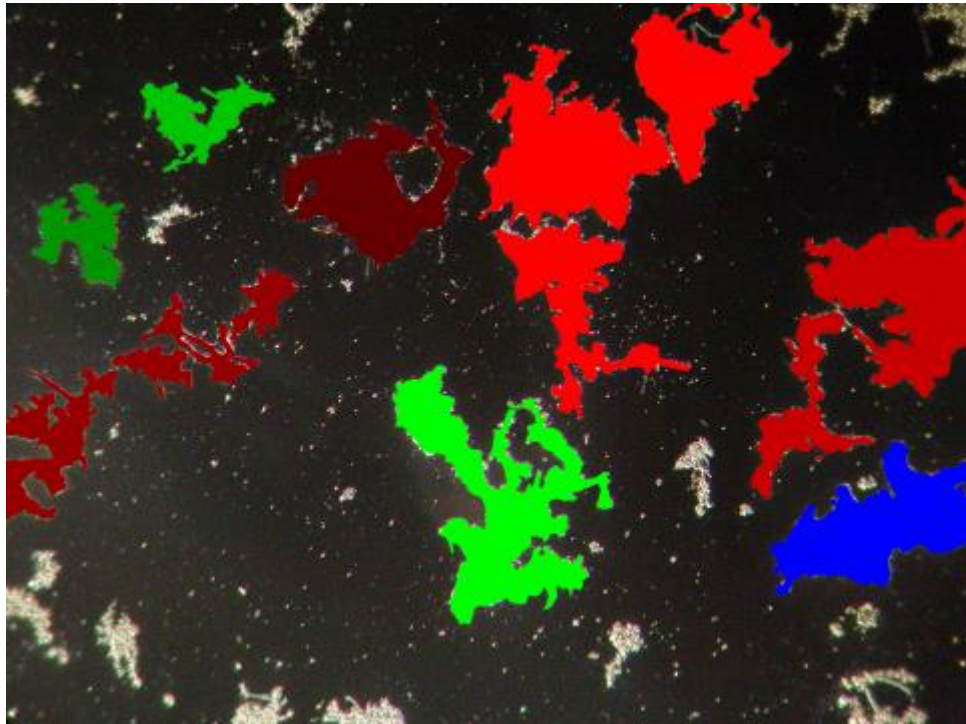

17-12-x10-4

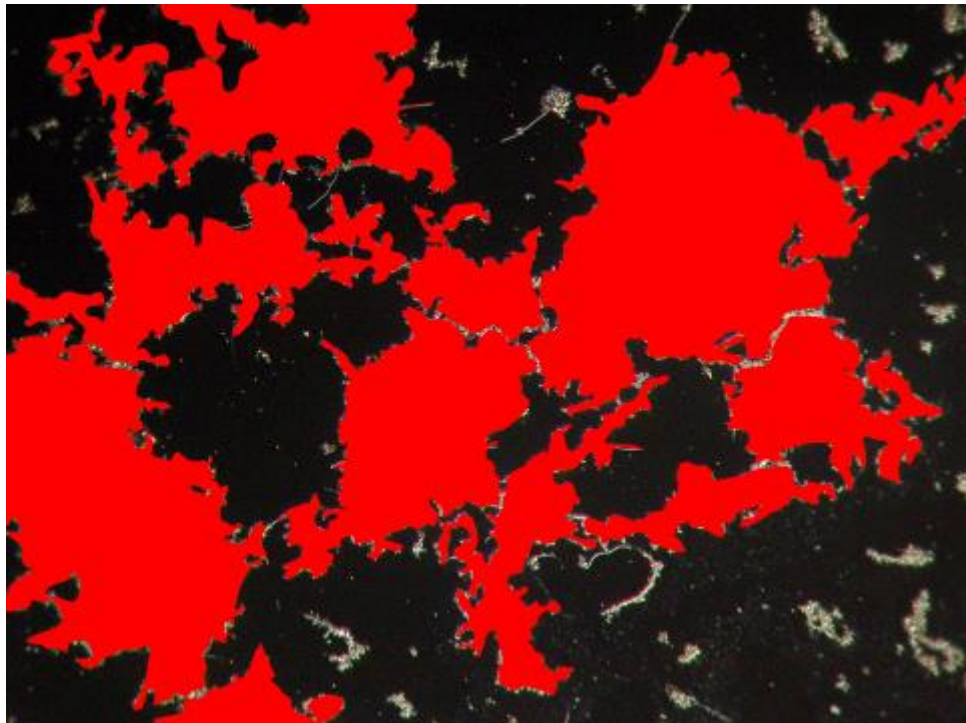

17-12-x10-5

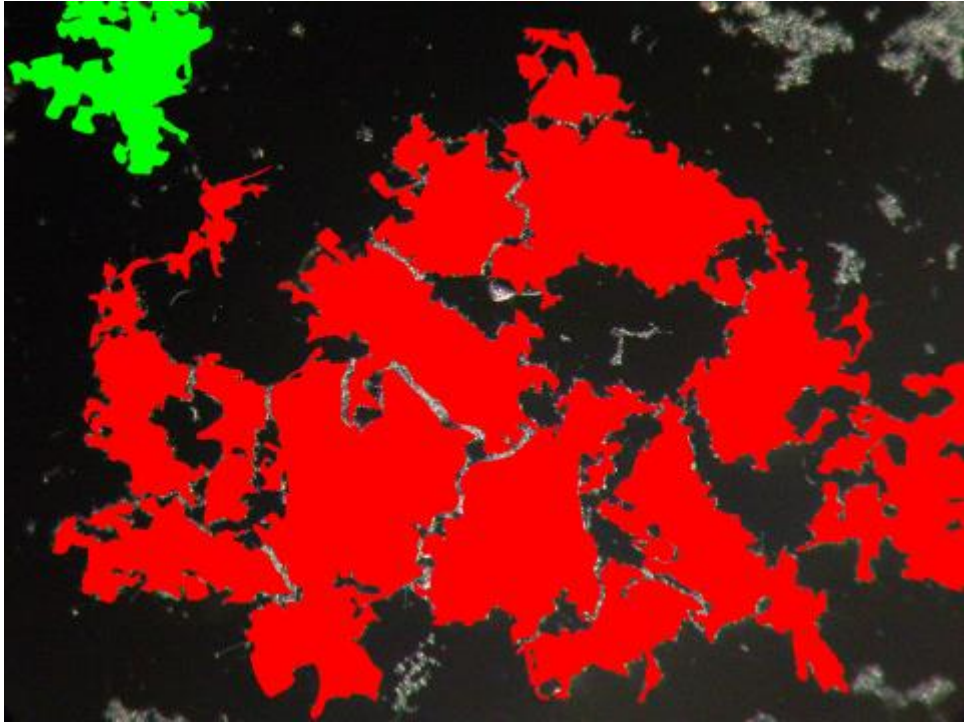

17-12-x10-6

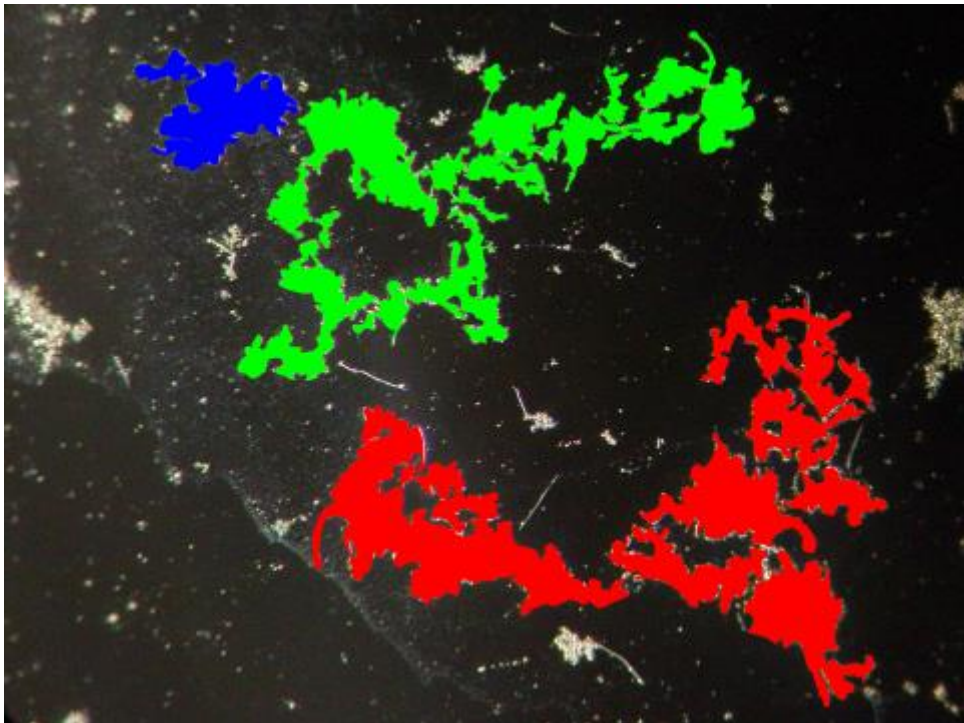



17-12-x10-7

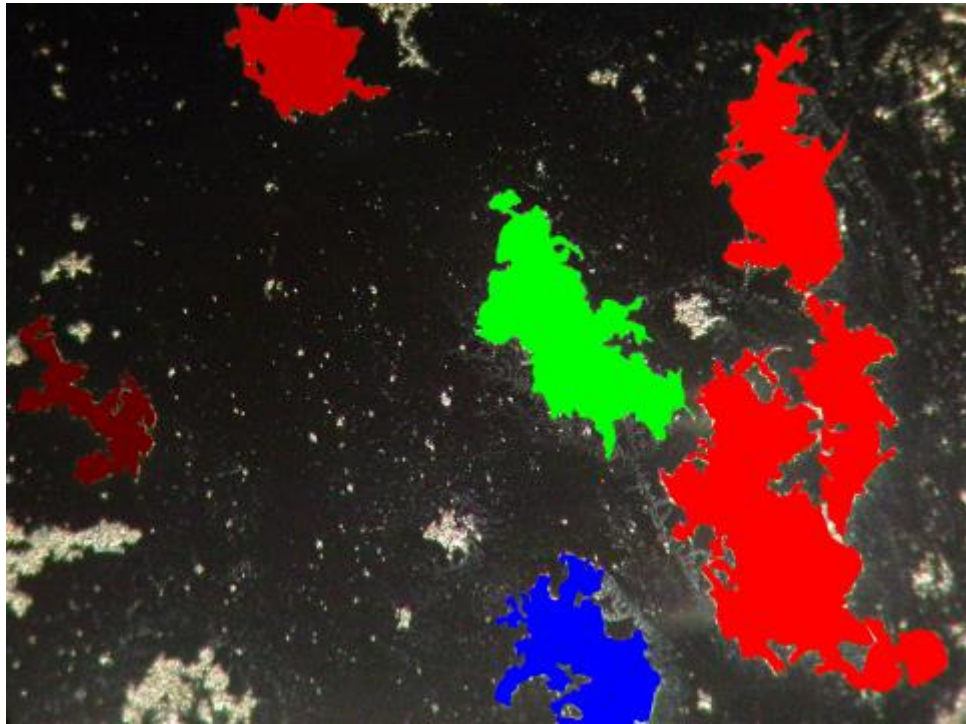

17-12-x10-8

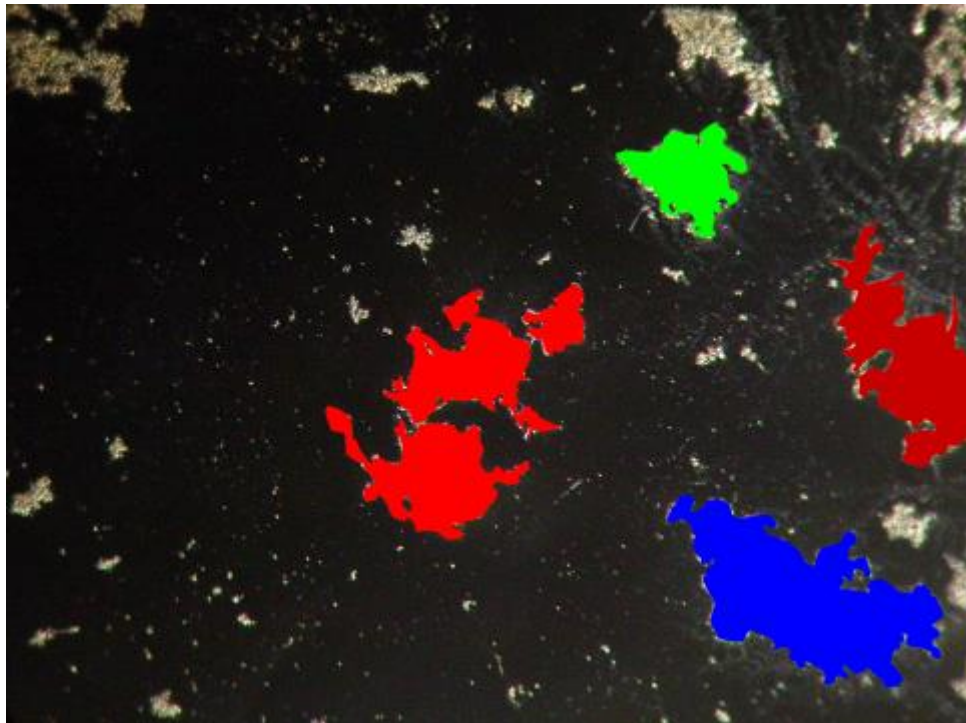

Supplement: f1 [file 5248509.f1.pdf]
